# Supplementary material for: The insulin/IGF signaling cascade modulates SUMOylation to regulate aging and proteostasis in Caenorhabditis elegans
Source: eLife journal article supplement (doi:10.7554/elife.38635), 2018-11-07
Supplement: supp [file elife-38635-supp-v1.zip]

Archive with 21 entries (21 files):
- elife_poa_e38635_Figure_3_figure_supplement_2.jpg
- elife_poa_e38635_Figure_3_figure_supplement_3.jpg
- elife_poa_e38635_Supplementary_File_5.xlsx
- elife_poa_e38635_Figure_3_figure_supplement_4.jpg
- elife_poa_e38635_Figure_2_figure_supplement_2.jpg
- elife_poa_e38635_Transparent_Reporting_File.pdf
- elife_poa_e38635_Supplementary_File_2.xlsx
- elife_poa_e38635_Figure_5_figure_supplement_3.jpg
- elife_poa_e38635_Supplementary_File_4.xlsx
- elife_poa_e38635_Supplementary_File_1.xlsx
- elife_poa_e38635_Supplementary_File_3.xlsx
- elife_poa_e38635_Figure_5_figure_supplement_2.jpg
- elife_poa_e38635_Figure_2_figure_supplement_1.jpg
- elife_poa_e38635_Figure_1_figure_supplement_1.jpg
- elife_poa_e38635_Figure_3_figure_supplement_1.jpg
- elife_poa_e38635_Figure_5_figure_supplement_1.jpg
- elife_poa_e38635_Figure_4_figure_supplement_1.jpg
- elife_poa_e38635_Figure_1_figure_supplement_2.jpg
- elife_poa_e38635_Supplementary_File_6.xlsx
- elife_poa_e38635_Figure_2_figure_supplement_4.jpg
- elife_poa_e38635_Figure_2_figure_supplement_3.jpg
