# Supplementary material for: The insulin/IGF signaling cascade modulates SUMOylation to regulate aging and proteostasis in Caenorhabditis elegans
Source: eLife journal article supplement (doi:10.7554/elife.38635), 2018-11-07
Supplement: supp [file elife-38635-supp-v1.zip › elife_poa_e38635_Supplementary_File_1.xlsx]

## Sheet: Sheet1
Supplementary File 1
Treatment	Description	Score	Coverage	# Proteins	# Unique Peptides
	SMO-1	281.41	47.25	1	6
	RPL-2	21	30	1	6
EV	RPL-18	23.34	32.45	1	5
	C42D4.1	12.79	19.12	1	5
	CAR-1	9.04	17.06	1	4
	RPL-2	18.13	23.46	1	6
	SMO-1	192.25	35.16	1	5
daf-2	RPL-18	18.64	25.53	1	4
RNAi	C42D4.1	7.06	12.75	1	3
	RPL-26, isoform b	5.31	25.47	3	2
	MTSS-1	7.44	16.47	1	2
	CAR-1	3.07	5.88	1	1
