# Supplementary material for: The insulin/IGF signaling cascade modulates SUMOylation to regulate aging and proteostasis in Caenorhabditis elegans
Source: eLife journal article supplement (doi:10.7554/elife.38635), 2018-11-07
Supplement: supp [file elife-38635-supp-v1.zip › elife_poa_e38635_Supplementary_File_2.xlsx]

## Sheet: Sheet1
Supplementary File 2
*Representative experiment
Strain	RNAi treatment	Mean lifespan±Sem (days)	number of animals/initial number	Mean lifespan (% of control)	p-value (against control)
CB1370	EV	47.62±1.73	56/108
	daf-16 RNAi	18.92±0.54	98/120	39.73	7.56072e-43
	car-1 RNAi	40.68±1.57	76/96	85.42	0.0039
CB1370*	EV	50.52±1.38	69/120
	daf-16 RNAi	17.56±0.56	69/120	34.75	1.34122e-46
	car-1 RNAi	40.02±1.40	83/120	79.22	2.29103e-07
CB1370	EV	43.54±1.61	68/108
	daf-16 RNAi	19.72±0.59	77/120	45.29	6.15501e-30
	car-1 RNAi	42.15±1.40	79/108	96.8	0.26
N2	EV	15.87±0.62	60/120
WH377	EV	14.89±0.41	86/120	93.84	0.13
N2*	EV	17.56±0.52	72/120
WH377*	EV	14.81±0.41	71/108	84.39	3.37576e-05
N2	EV	16.77±0.63	65/120
WH377	EV	12.71±0.48	70/108	75.79	9.79013e-08
CF1903*	EV	18.13±0.85	73/108
	daf-16 RNAi	10.71±0.33	76/120	59.1	3.433e-07
	car-1 RNAi	17.76±0.72	71/108	97.97	0.37
CF1903	EV	19.33±0.89	80/120
	daf-16 RNAi	12.56±0.35	86/120	65.01	5.92351e-12
	car-1 RNAi	17.09±0.81	90/120	88.43	0.03
CF1903	EV	22.78±1.05	76/120
	daf-16 RNAi	13.76±0.46	68/108	60.41	2.65571e-12
	car-1 RNAi	22.04±1.02	75/120	96.74	0.31
CF2052*	EV	16.59±0.43	92/120
	daf-16 RNAi	13.37±0.26	92/120	80.59	7.83297e-10
	car-1 RNAi	15.96±0.39	77/120	96.2	0.14
CF2052	EV	18.83±0.48	78/120
	daf-16 RNAi	15.73±0.51	64/120	83.54	2.04906e-06
	car-1 RNAi	19.17±0.0.38	77/120	101.81	0.29
CF2052	EV	17.02±0.54	55/108
	daf-16 RNAi	16.15±0.69	45/108	94.89	0.16
	car-1 RNAi	19±0.43	73/108	111.63	0.002
CF1038	EV	16.77±0.44	77/120
	car-1 RNAi	15.74±0.4	62/120	93.86	0.04
CF1038*	EV	15.37±0.48	67/120
	car-1 RNAi	15.74±0.47	61/120	109.53	0.3
CF1038	EV	16.67±0.47	78/120
	car-1 RNAi	16.53±0.46	76/120	99.16	0.42
N2*	EV	14.70±0.59	66/120
EHC118*	EV	22.51±0.60	84/120	153.46	1.65221e-16
N2	EV	14.92±0.63	63/120
EHC118	EV	21.30±0.61	79/120	142.79	1.54416e-11
N2	EV	15.91±0.56	56/108
EHC118	EV	21.12±0.70	74/108	132.76	8.98898e-08
EHC118	EV	21.25±0.65	83/108
	daf-16 RNAi	19.32±0.57	68/96	90.93	0.015
EHC118	EV	21.36±0.49	88/120
	daf-16 RNAi	16.34±0.46	70/120	76.51	6.12e-12
EHC118*	EV	21.73±0.61	81/120
	daf-16 RNAi	18.32±0.47	81/120	84.35	1.00197e-05
e1368	EV	28.43±0.65	100/121
	daf-16 RNAi	23.44±0.50	102/121	82.4	2.75e-10
	car-1 RNAi	27.46±0.54	111/120	96.6	0.14
