# Supplementary material for: The insulin/IGF signaling cascade modulates SUMOylation to regulate aging and proteostasis in Caenorhabditis elegans
Source: eLife journal article supplement (doi:10.7554/elife.38635), 2018-11-07
Supplement: supp [file elife-38635-supp-v1.zip › elife_poa_e38635_Supplementary_File_3.xlsx]

## Sheet: Sheet1
Supplemetary File 3
*Representative experiment
Strain	RNAi treatment	Mean lifespan±sem (days)	number of animals/initial number	Mean lifespan (% of control)	p-value (against control)
CF512*	EV	18.01±0.63	101/120
	daf-16 RNAi	12.19±0.44	110/120	67.67	9.35995e-14
	car-1 RNAi	14.87±0.48	80/96	82.58	0.00011
CF512	EV	20.09±0.74	64/120
	daf-16 RNAi	12.94±0.63	66/108	64.42	7.89948e-12
	car-1 RNAi	16.63±0.65	70/108	82.75	0.00034
CF512	EV	17.74±0.65	81/120
	daf-16 RNAi	12.74±0.37	73/120	71.81	7.85034e-16
	car-1 RNAi	15.97±0.56	75/120	90.04	0.34
N2	EV	16.13±0.63	62/120
EHC118, clone 2	EV	18.96±0.68	54/99	117.54	0.00139
EHC118, clone 2	daf-16 RNAi	15.17±0.53	69/108	94.05 compared to N2 80.01 compared to EHC118 EV	0.12 compared to N2 8.64E-06 compared to EHC118 EV
N2	EV	16.70±0.67	54/108
EHC118, clone 2	EV	19.73±0.63	60/108	118.14	0.00069
EHC118, clone 2*	daf-16 RNAi	16.9±0.63	60/96	101 compared to N2 85.79 compared to EHC118 EV	0.42 compared to N2 0.00097 compared to EHC118 EV
N2*	EV	16.67±0.52	63/120
EHC118 , clone 2*	EV	21.30±0.62	89/120	127.78	1.46e-07
EHC118 , clone 2*	daf-16 RNAi	17.14±0.46	95/120	102.82 compared to N2 80.47 compared to EHC118 EV	0.28 compared to N2 8.93E-08 compared to EHC118 EV
N2*	EV	16.84±0.56	69/120
EHC121*	EV	16.32±0.54	78/108	96.91	0.25
N2	EV	18.51±0.54	74/120
EHC121	EV	17.36±0.54	66/108	93.79	0.069
N2	EV	18.99±0.52	69/120
EHC121	EV	17.78±0.47	91/120	93.63	0.045
EHC121*	EV	17.37±0.58	84/120
	daf-16 RNAi	13.15±0.46	66/108	75.71	7.49e-08
EHC121	EV	17.57±0.53	67/96
	daf-16 RNAi	14.45±0.41	66/108	82.24	4.4e-06
EHC121	EV	16.39±0.58	70/108
	daf-16 RNAi	12.57±0.41	65/108	76.69	2.87e-07
N2*	EV	18.09±0.41	102/120
EHC121, clone 2*	EV	18.04±0.55	74/96	99.72	0.47
EHC121, clone 2*	daf-16 RNAi	14.95±0.47	83/96	82.64	1.60-E07 compared to N2, 1.58E-05 compared to EHC121 EV
N2	EV	0.51±17.07	86/120
EHC117	EV	0.47±15.241	59/108	89.28	0.0039
EHC117	daf-16 RNAi	0.34±10.55	83/120	61.74	8.39E-21 compared to N2,
*N2	EV	0.46±16.15	75/108
EHC117*	EV	0.39±15.82	76/120	97.96	0.29
EHC117*	daf-16 RNAi	11.74±0.37	76/120	72.69	2.29E-12 compared to N2
N2	EV	0.56±17.23	57/108
EHC117	EV	0.5±14.23	55/108	82.64	5.82e-05
EHC117	daf-16 RNAi	0.35±11.65	62/108	67.56	1.79E-05 compared to N2
