# Supplementary material for: The insulin/IGF signaling cascade modulates SUMOylation to regulate aging and proteostasis in Caenorhabditis elegans
Source: eLife journal article supplement (doi:10.7554/elife.38635), 2018-11-07
Supplement: supp [file elife-38635-supp-v1.zip › elife_poa_e38635_Supplementary_File_4.xlsx]

## Sheet: Sheet1
Supplemetary File 4
*Representative experiment
Strain	RNAi treatment	Mean lifespan±sem (days)	number of animals/initial number	Mean lifespan (% of control)	p-value (against control)
CF2531*	Ev	19.16±0.44	90/120
	daf-16 RNAi	14.53±0.36	81/120	75.84	8.54e-14
	car-1 RNAi	17.48±0.45	73/120	91.23	0.005
CF2531	Ev	18.56±0.469	90/120
	daf-16 RNAi	14.57±0.34	77/120	78.5	2.30122e-10
	car-1 RNAi	16.48±0.42	84/120	88.79	0.001
CF2531	Ev	19.08±0.57	52/120
	daf-16 RNAi	15.34±0.42	56/120	80.3983	1.27269e-07
	car-1 RNAi	16.90±0.42	70/120	88.5744	0.0008
AA86	Ev	18.30±0.46	77/120
	daf-16 RNAi	15.06±0.38	88/120	82.3	8.27149e-08
	car-1 RNAi	16.25±0.30	84/120	88.8	0.00013
AA86	Ev	18.33±0.52	80/120
	daf-16 RNAi	16.53±0.52	58/108	90.18	0.0099
	car-1 RNAi	15.92±0.45	61/108	86.85	0.0005
AA86*	Ev	17.19±0.38	64/120
	daf-16 RNAi	13.70±0.60	37/108	79.7	6.03391e-07
	car-1 RNAi	15.03±0.34	59/120	87.43	2.26132e-05
