# Supplementary material for: The insulin/IGF signaling cascade modulates SUMOylation to regulate aging and proteostasis in Caenorhabditis elegans
Source: eLife journal article supplement (doi:10.7554/elife.38635), 2018-11-07
Supplement: supp [file elife-38635-supp-v1.zip › elife_poa_e38635_Supplementary_File_5.xlsx]

## Sheet: Sheet1
Supplemetary File 5
*Representative experiment
Strain	RNAi treatment	Mean lifespan±sem (days)	number of animals/initial number	Mean lifespan (% of control)	p-value (against control)
CF512*	EV	16.18±0.40	100/120
	daf-16 RNAi	13.11±0.28	101/120	81.03	8.95e-10
	cgh-1 RNAi	13.15±0.25	79/120	81.27	8.4e-10
CF512	EV	19.06±0.40	99/120
	daf-16 RNAi	12.83±0.42	77/108	67.31	3.45e-21
	cgh-1 RNAi	13.73±0.20	113/120	72.04	3.37e-27
