# Supplementary material for: The insulin/IGF signaling cascade modulates SUMOylation to regulate aging and proteostasis in Caenorhabditis elegans
Source: eLife journal article supplement (doi:10.7554/elife.38635), 2018-11-07
Supplement: supp [file elife-38635-supp-v1.zip › elife_poa_e38635_Supplementary_File_6.xlsx]

## Sheet: Sheet1
Supplemetary File 6
*Representative experiment
Strain	RNAi treatment	Mean lifespan±sem (days)	number of animals/initial number	Mean lifespan (% of control)	p-value (against control)
CF512	EV	6.39±0.12	100/120
on P.aeroginosa	daf-2 RNAi	12.54±0.41	94/120	196.34	1.50276e-33
	daf-16 RNAi	5.40±0.11	89/120	84.47	4.69153e-07
	car-1 RNAi	6.65±1.9	98/120	104.15	0.12
CF512*	EV	5.88±0.15	86/108
on P.aeroginosa	daf-2 RNAi	11.96±0.42	82/120	203.43	3.08095e-29
	daf-16 RNAi	4.28±0.11	91/120	72.75	4.49546e-14
	car-1 RNAi	6.77±0.21	91/120	115.1	0.0004
CF512	EV	6.54±0.18	91/120
on P.aeroginosa	daf-2 RNAi	11.20±0.27	84/120	171.33	2.21293e-33
	daf-16 RNAi	5.40±0.15	91/120	82.5	8.05586e-07
	car-1 RNAi	7.03±0.18	103/120	107.49	0.027
CF512*	EV	7.97±0.21	114/122
after UV radiation	daf-2 RNAi	10.45±0.22	102/120	131.18	1.11691e-15
	car-1 RNAi	9.23±0.22	113/120	115.93	2.65223e-05
CF512	EV	8.62±0.23	115/120
after UV radiation	daf-2 RNAi	12.22±0.25	118/120	141.81	7.09701e-22
	car-1 RNAi	9.46±0.27	115/120	109.73	0.01
CF512	EV	11.13±0.30	99/120
after UV radiation	daf-2 RNAi	12.91±0.38	98/120	115.95	0.00018
	car-1 RNAi	12.59±0.33	101/120	113.12	0.00078
on P.aeroginosa*
N2	EV	6.05±0.17	73/120
EHC117	EV	5.43±0.14	97/120	89.75	0.0042
EHC118	EV	5.66±0.17	83/120	93.55	0.1029 NS
After UV radiation*
N2	EV	12.78±0.33	91/200
EHC117	EV	8.89±0.19	146/200	69.56	2.3722e-22
EHC118	EV	10.87±0.27	113/160	85.05	1.0995e-05
After UV radiation
N2	EV	12.61±0.29	122/200
EHC117	EV	9.29±0.25	107/200	73.67	3.3209e-15
EHC118	EV	10.43±0.21	115/200	82.71	6.99e-09
