# Supplementary figures and images for: The insulin/IGF signaling cascade modulates SUMOylation to regulate aging and proteostasis in Caenorhabditis elegans
Source: eLife journal article supplement (doi:10.7554/elife.38635), 2018-11-07

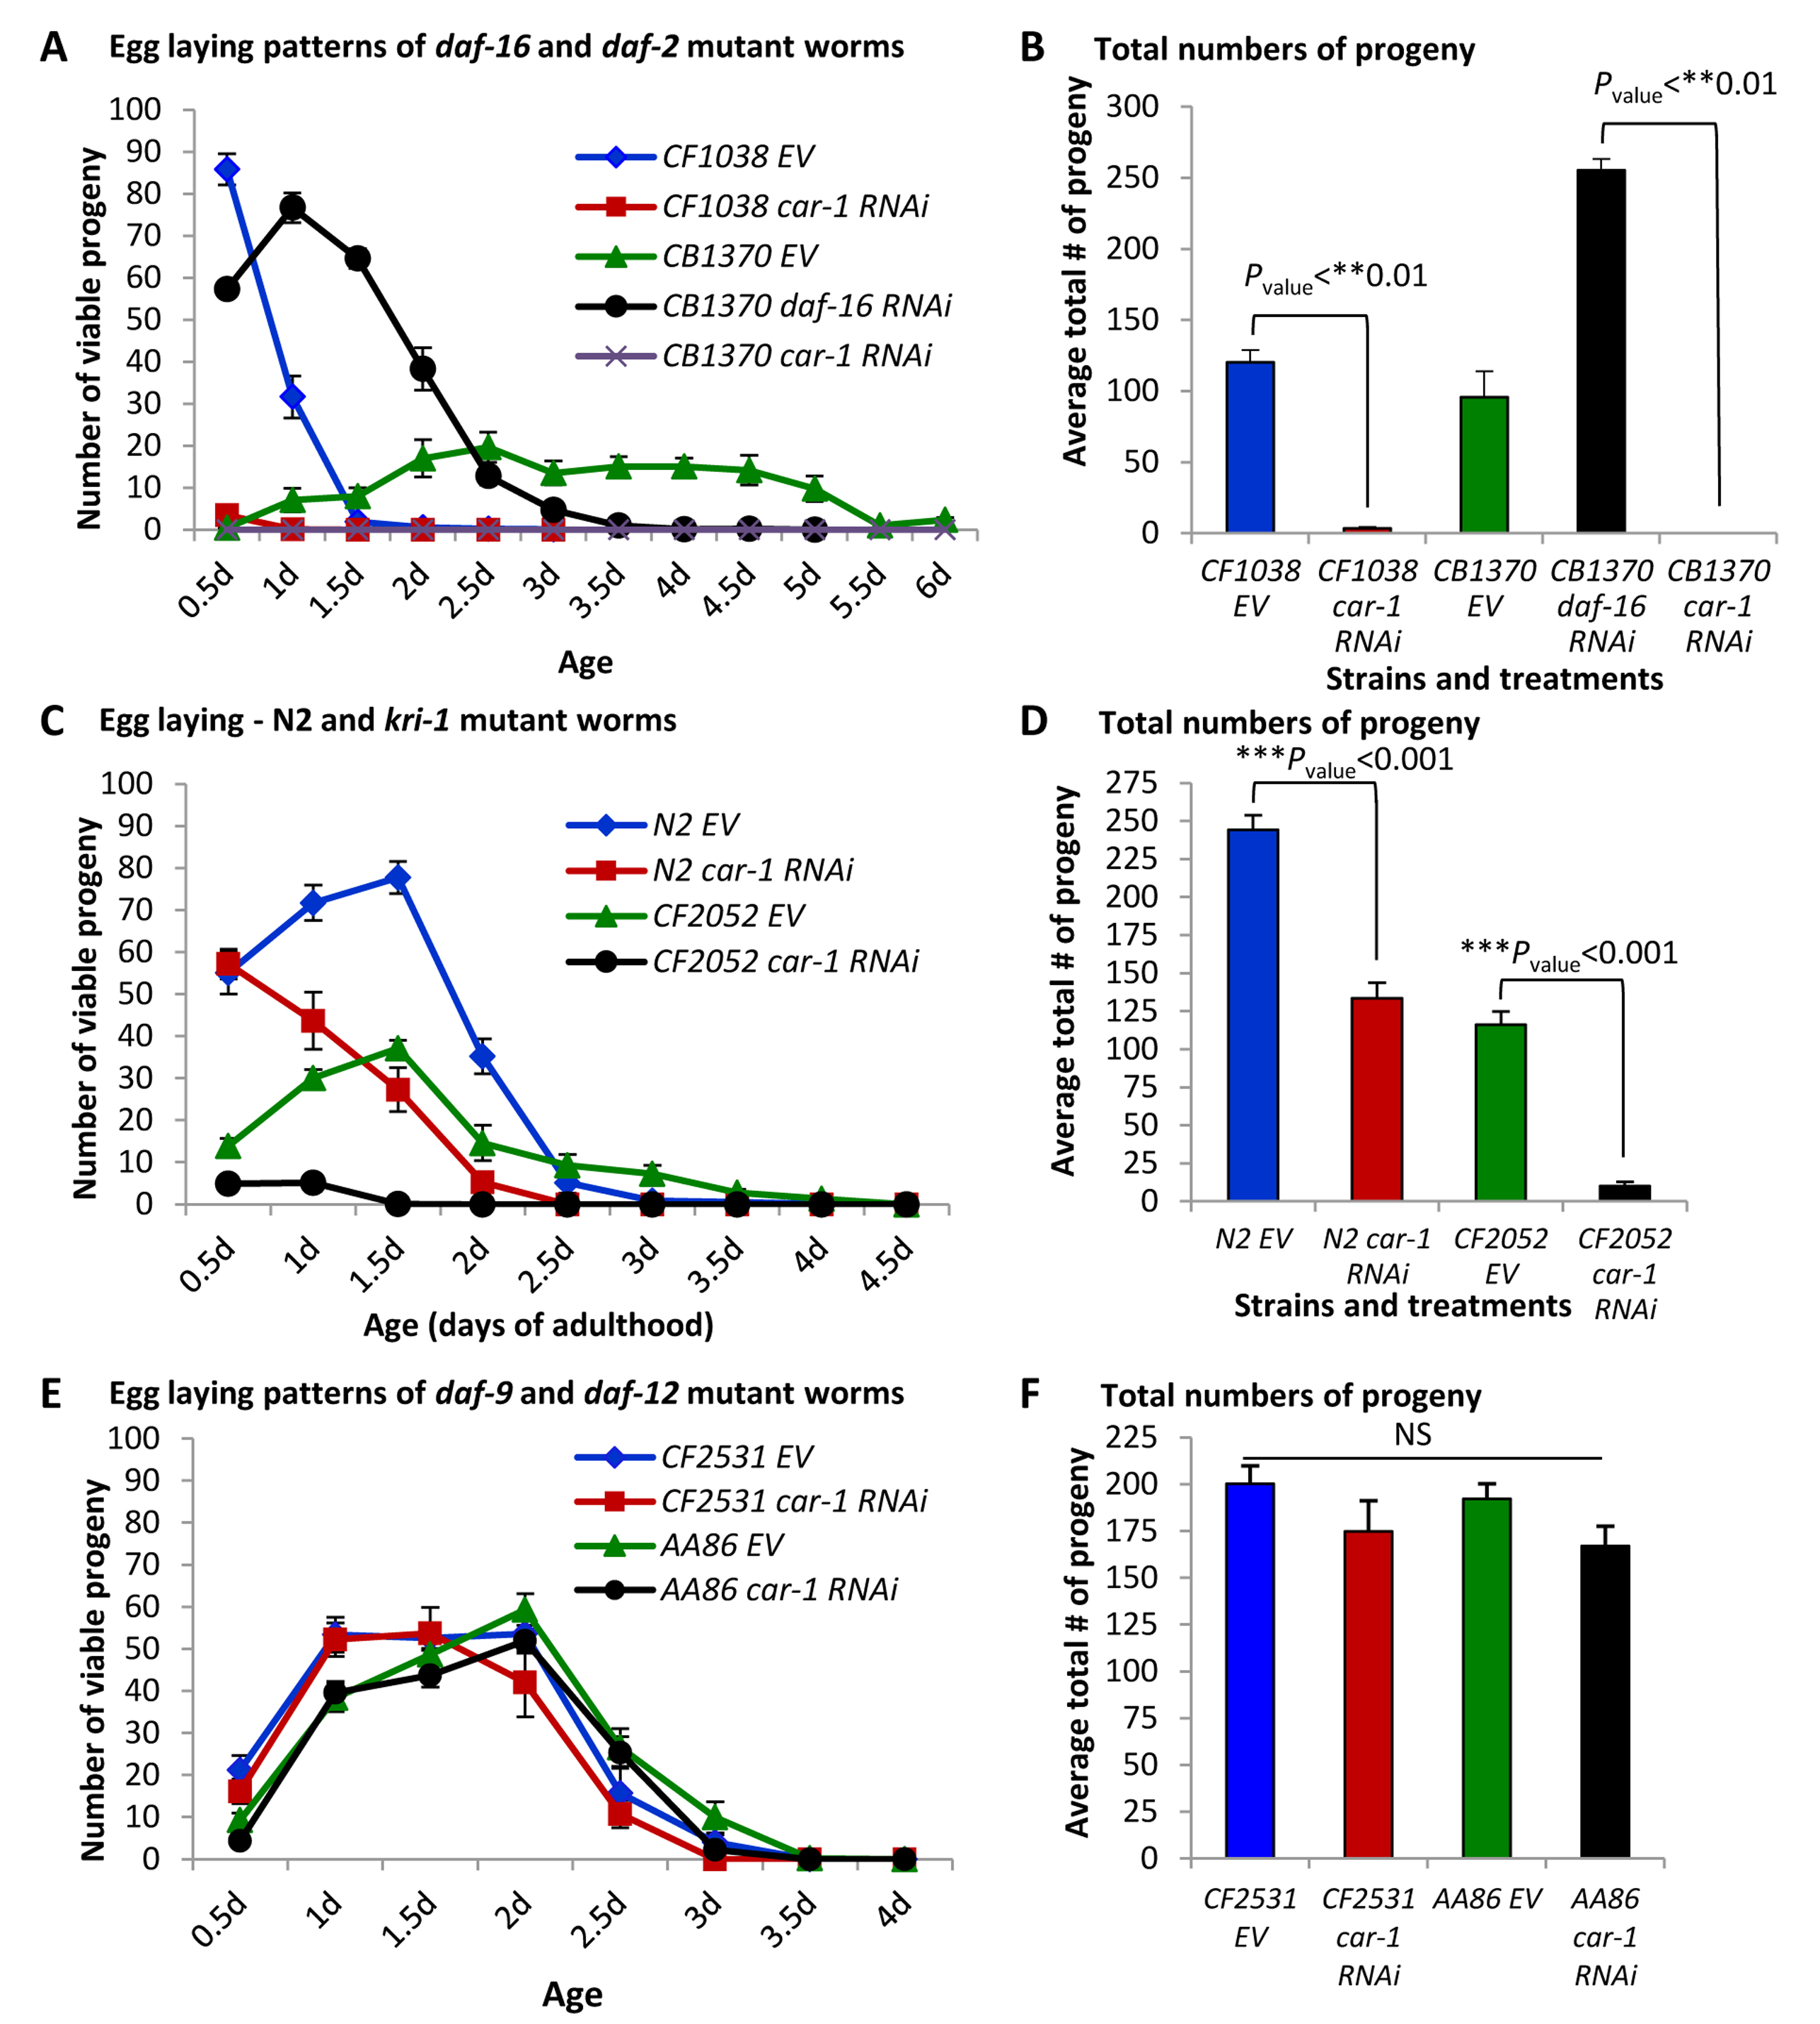

Supplement: supp [file elife-38635-supp-v1.zip › elife_poa_e38635_Figure_3_figure_supplement_2.jpg]

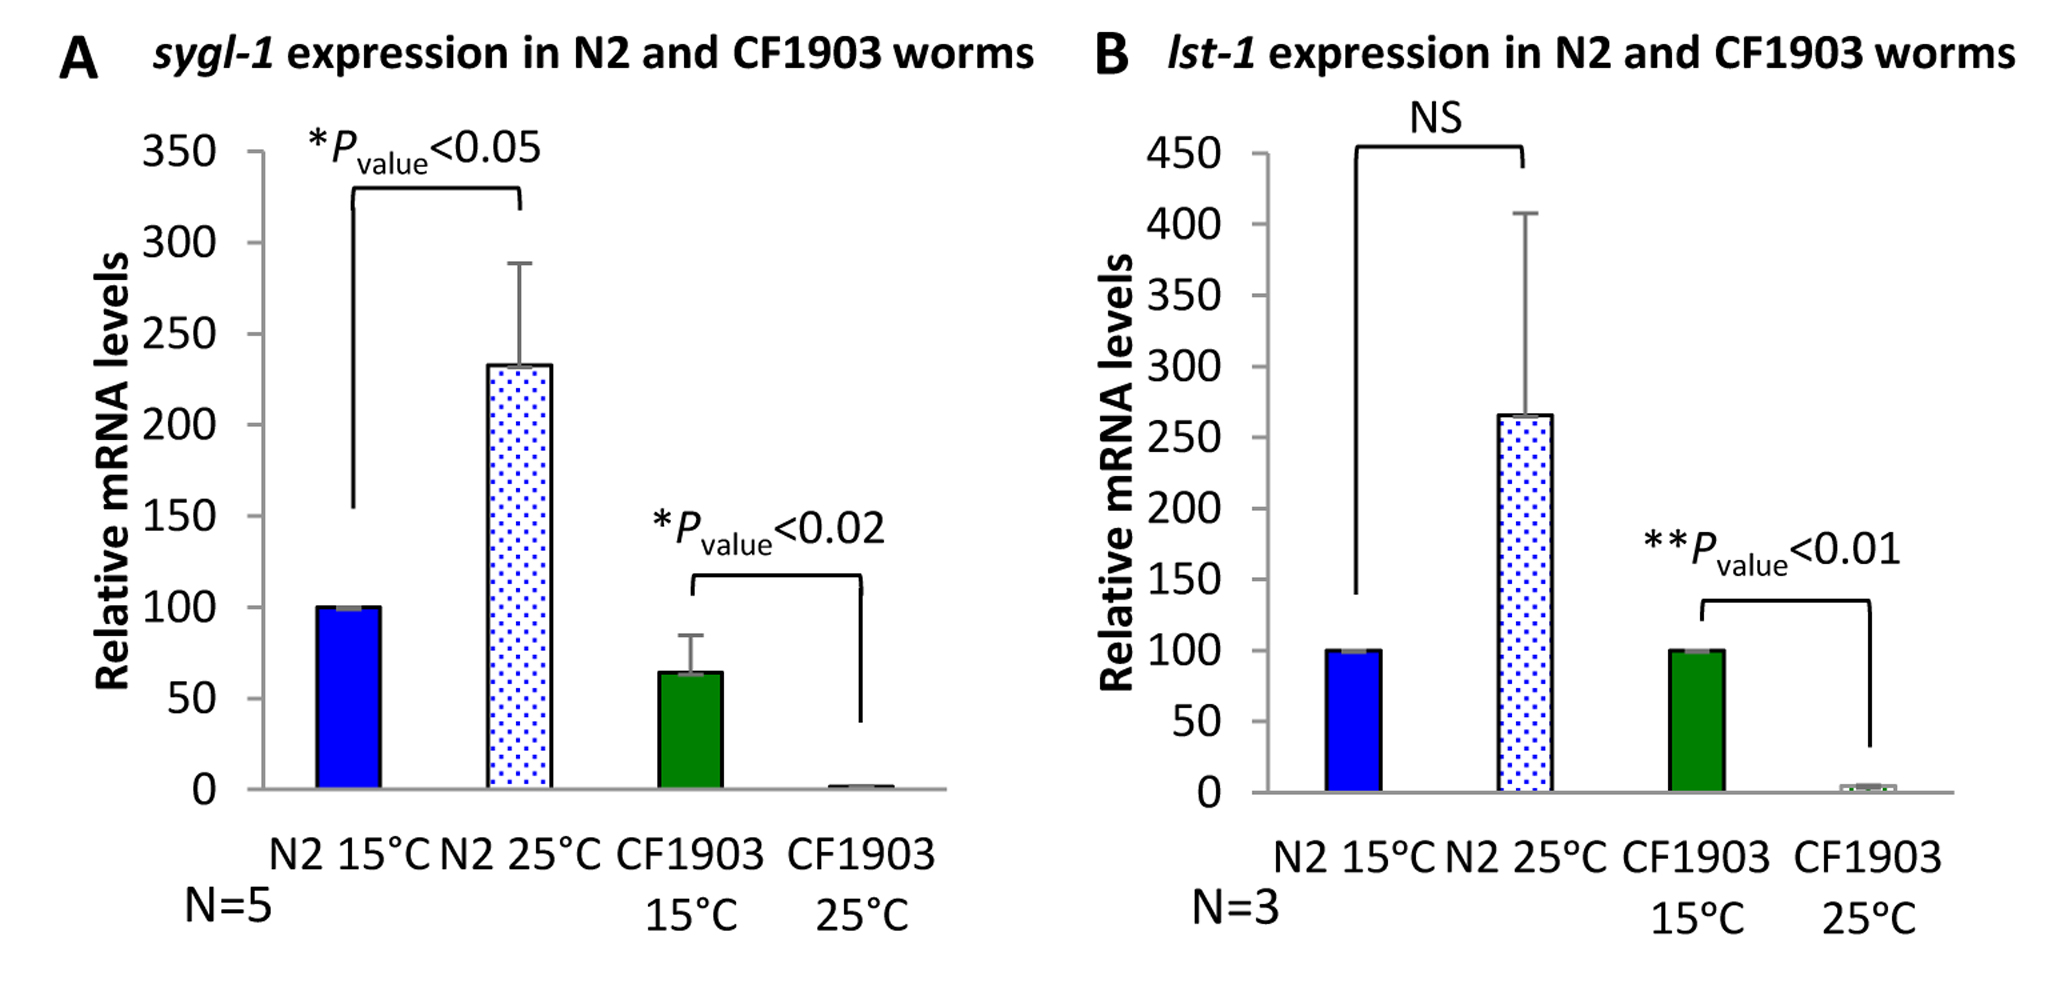

Supplement: supp [file elife-38635-supp-v1.zip › elife_poa_e38635_Figure_3_figure_supplement_3.jpg]

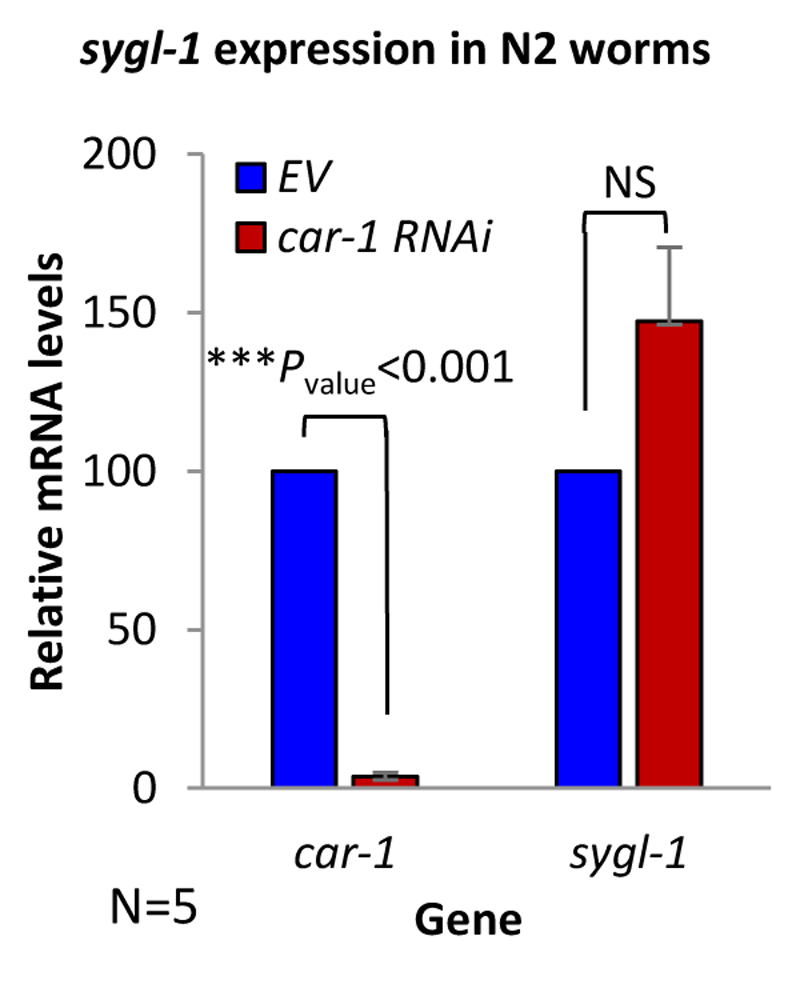

Supplement: supp [file elife-38635-supp-v1.zip › elife_poa_e38635_Figure_3_figure_supplement_4.jpg]

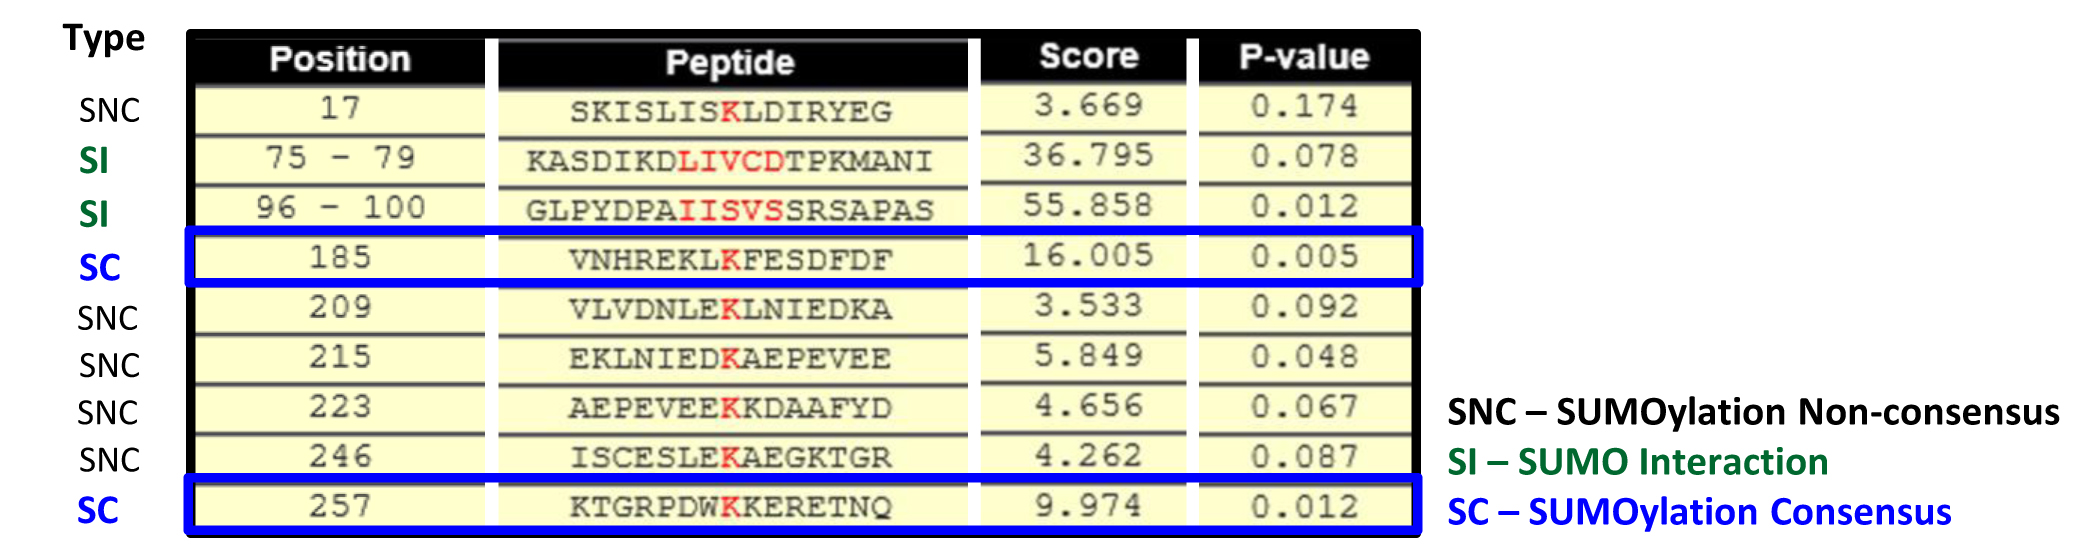

Supplement: supp [file elife-38635-supp-v1.zip › elife_poa_e38635_Figure_2_figure_supplement_2.jpg]

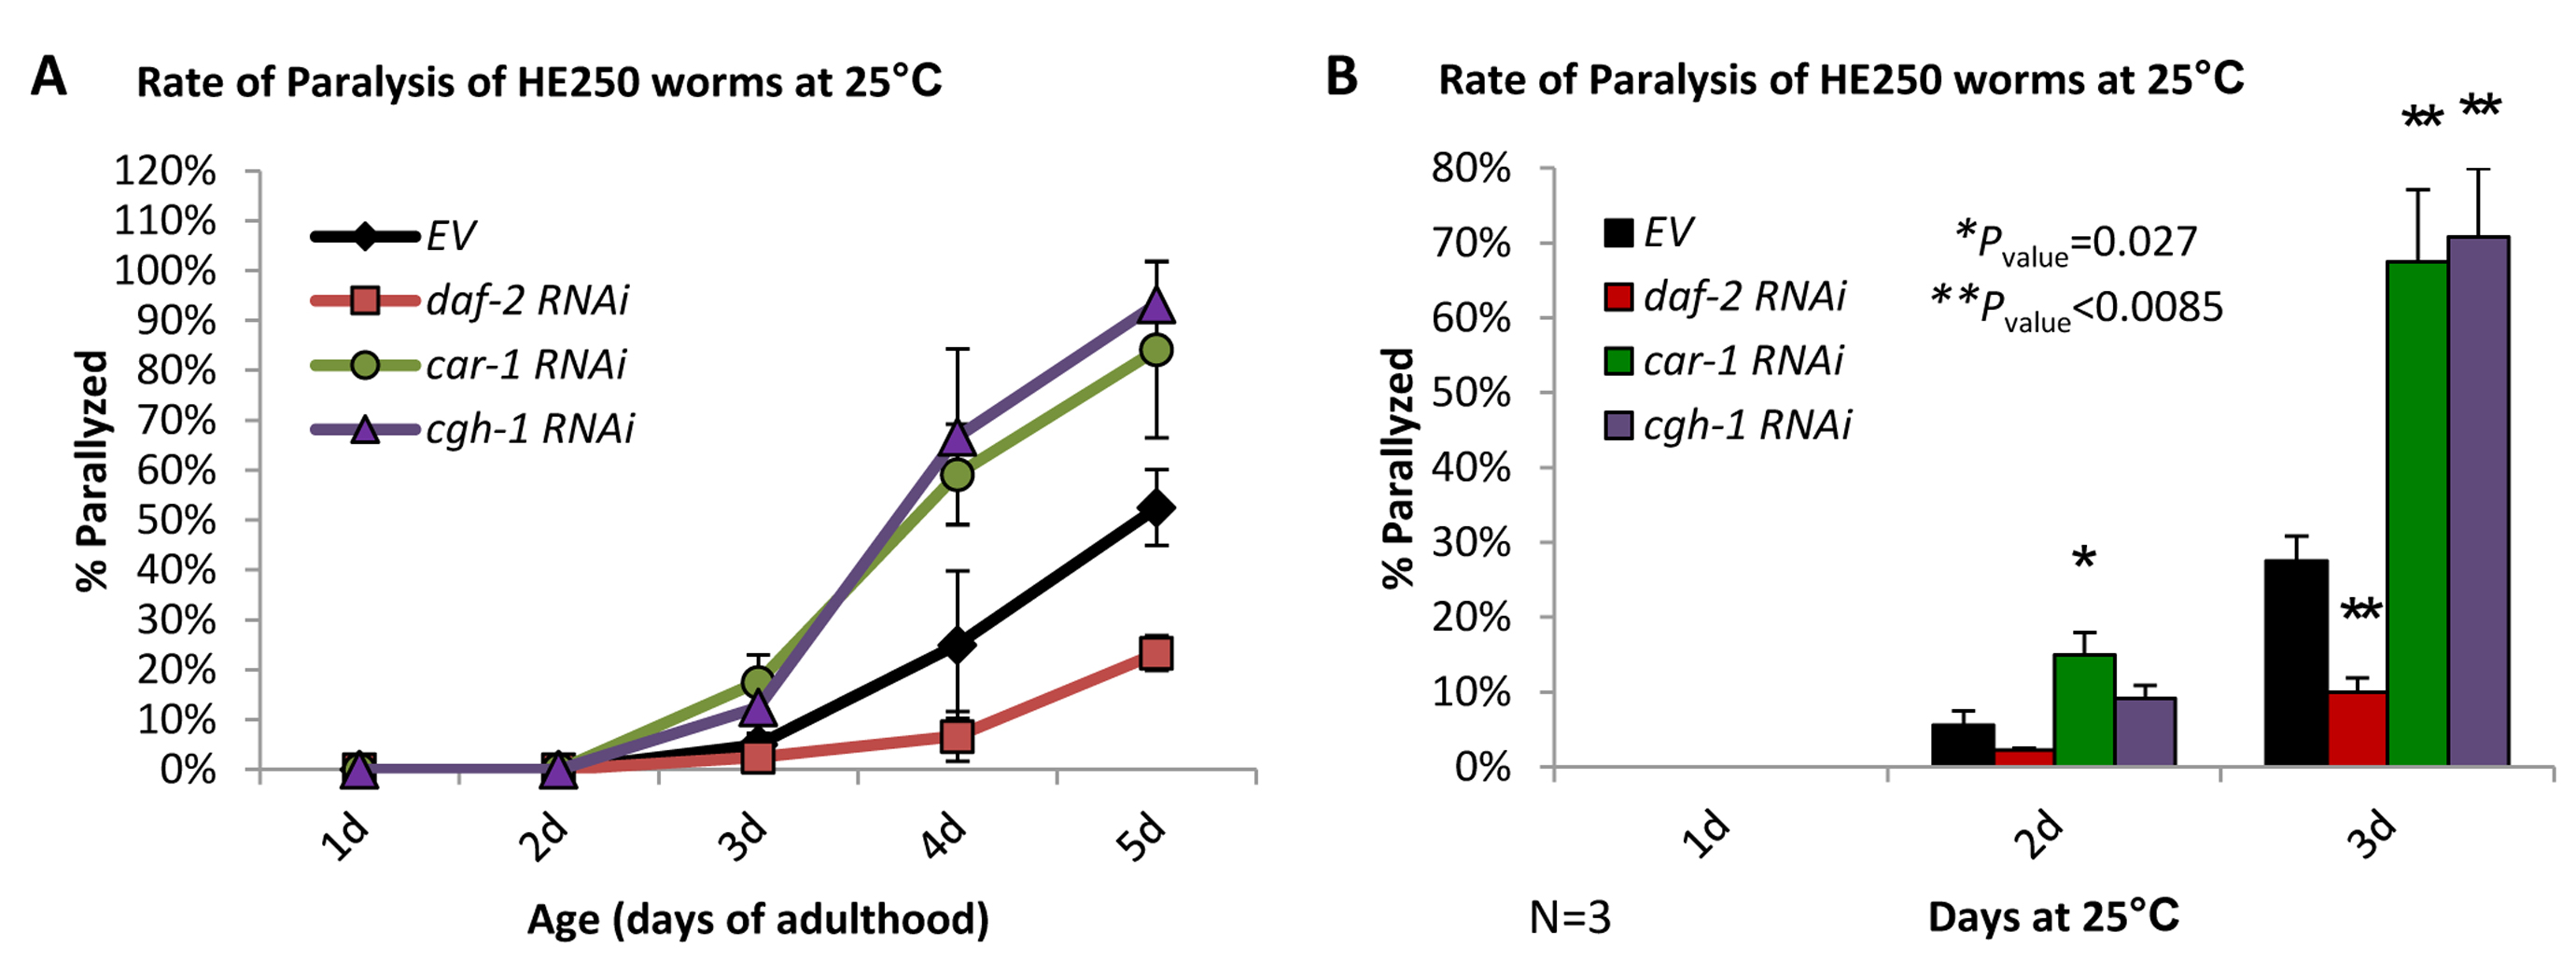

Supplement: supp [file elife-38635-supp-v1.zip › elife_poa_e38635_Figure_5_figure_supplement_3.jpg]

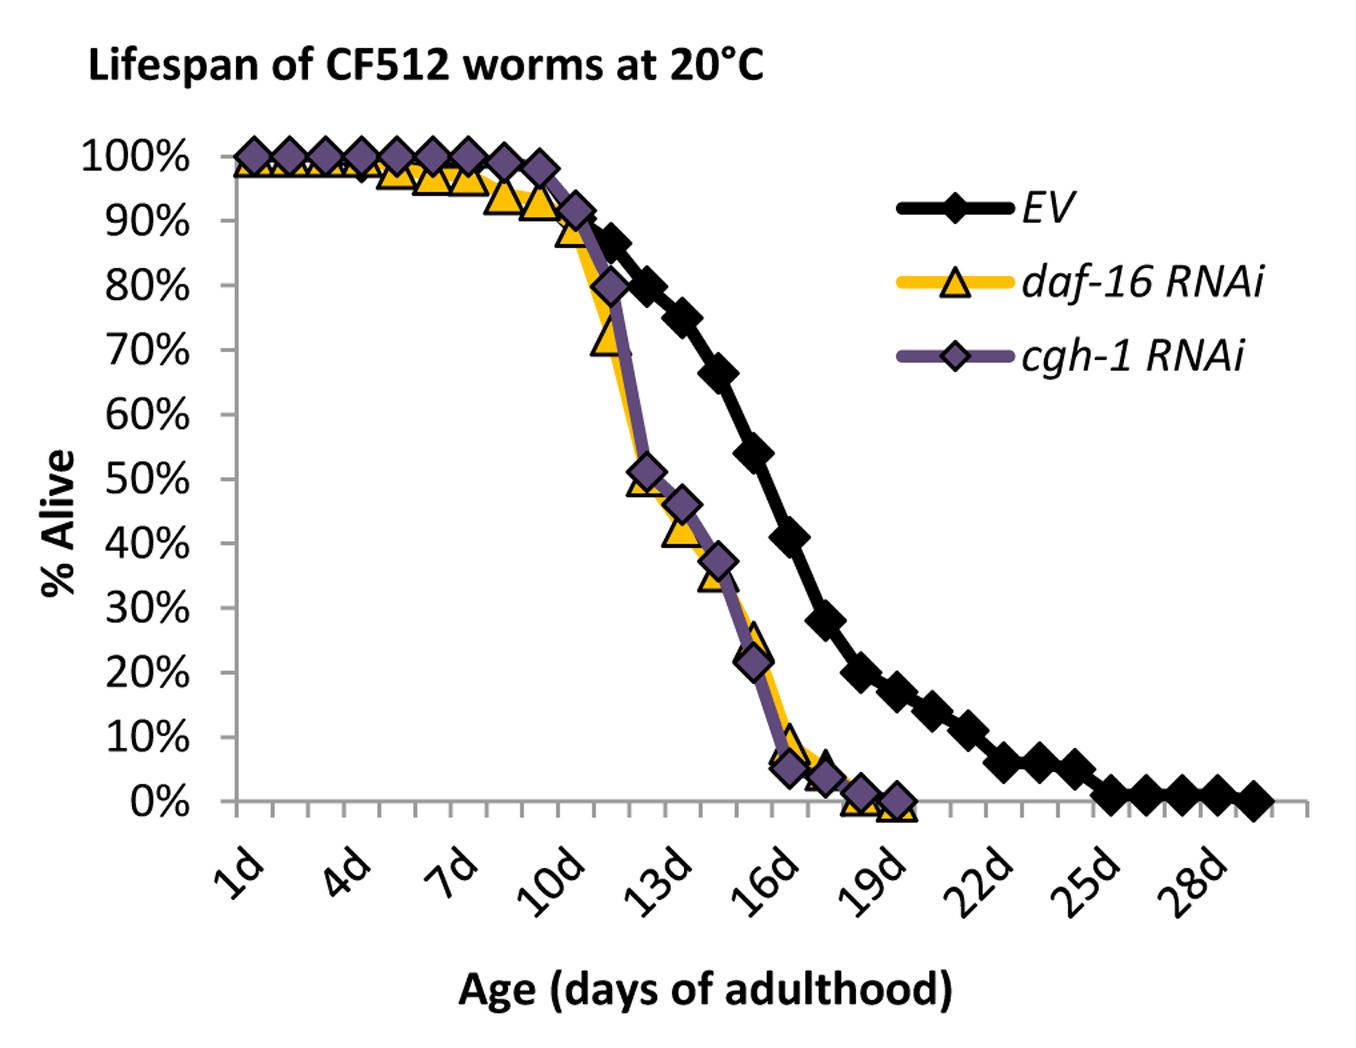

Supplement: supp [file elife-38635-supp-v1.zip › elife_poa_e38635_Figure_5_figure_supplement_2.jpg]

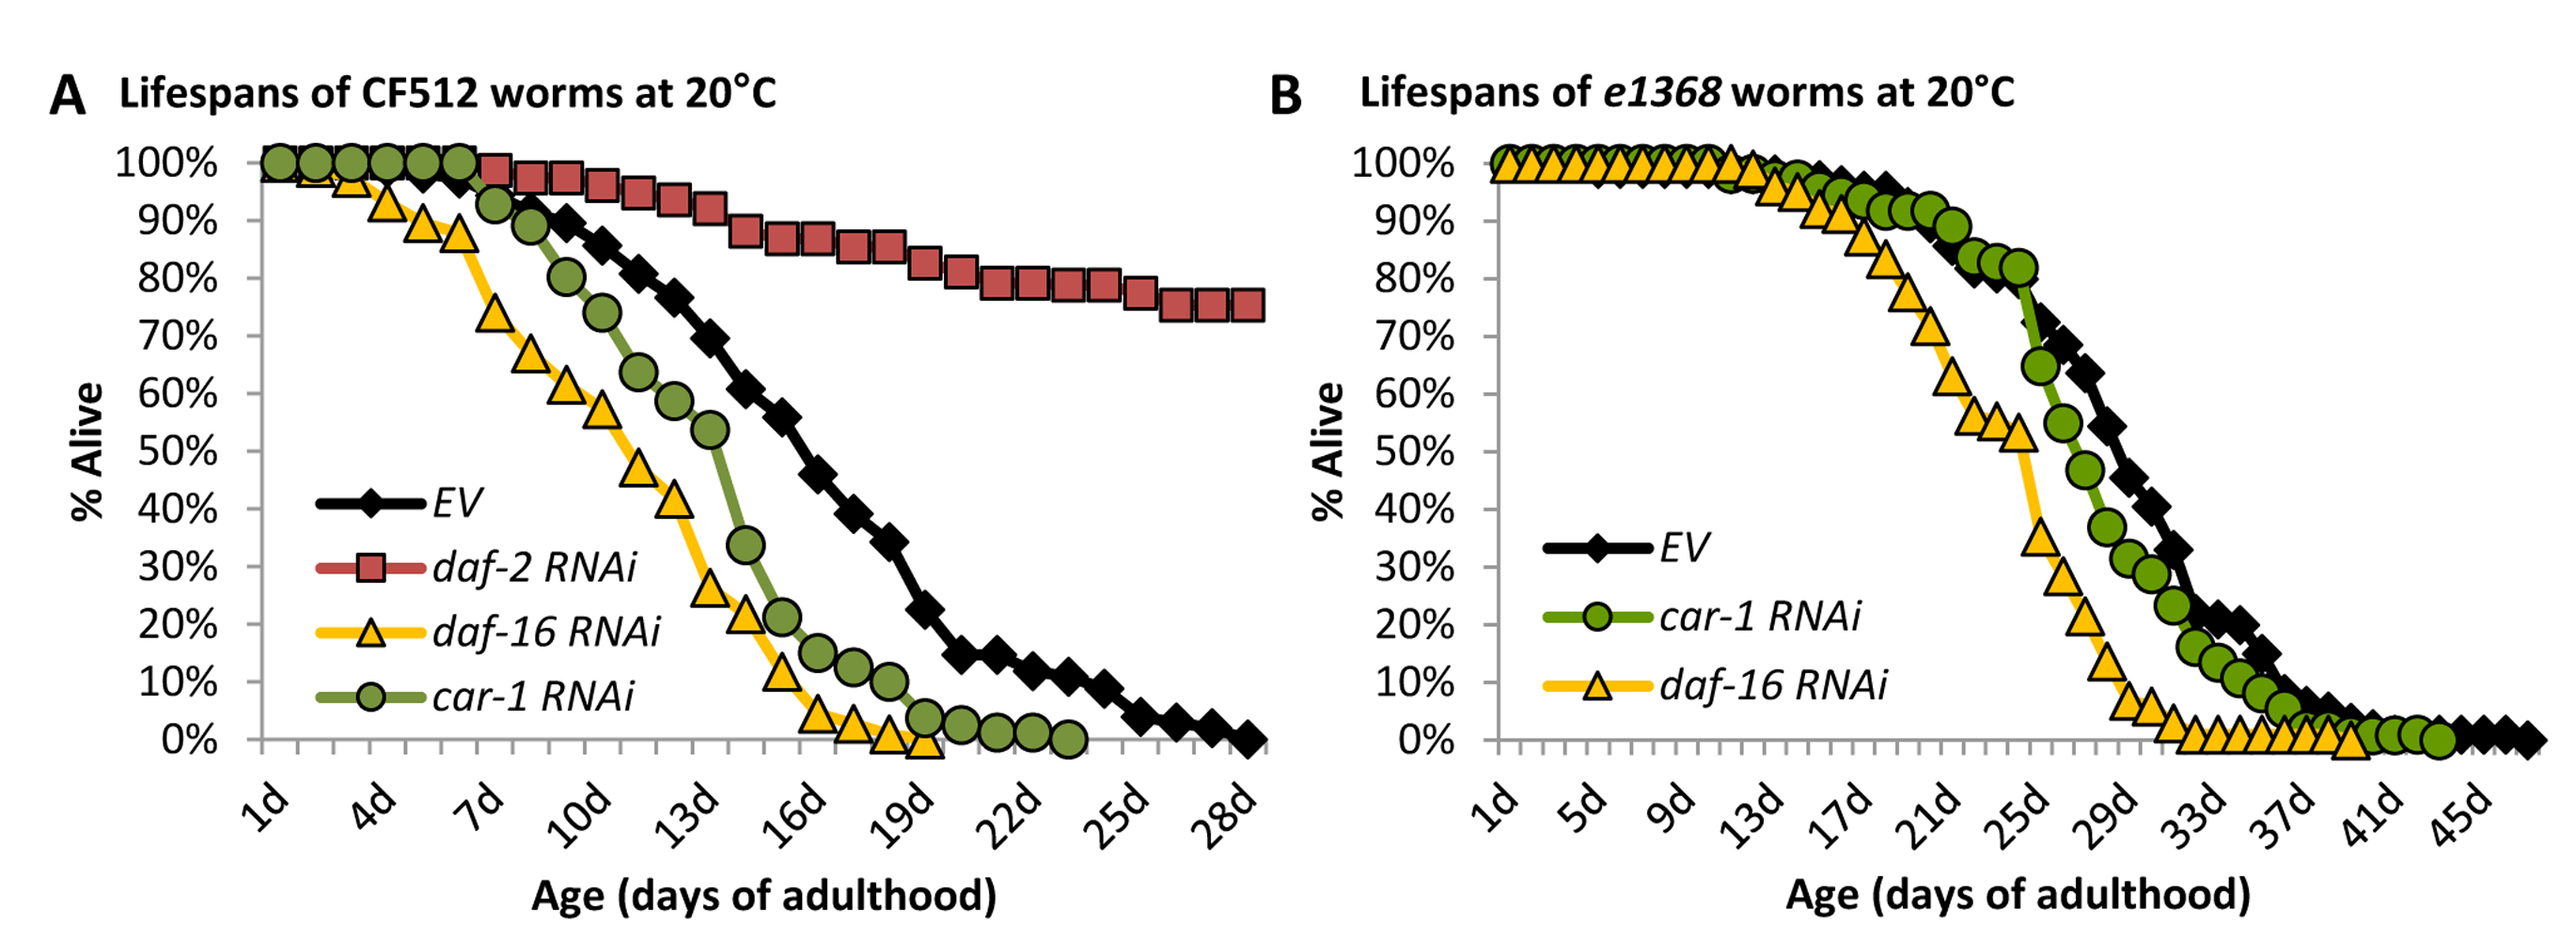

Supplement: supp [file elife-38635-supp-v1.zip › elife_poa_e38635_Figure_2_figure_supplement_1.jpg]

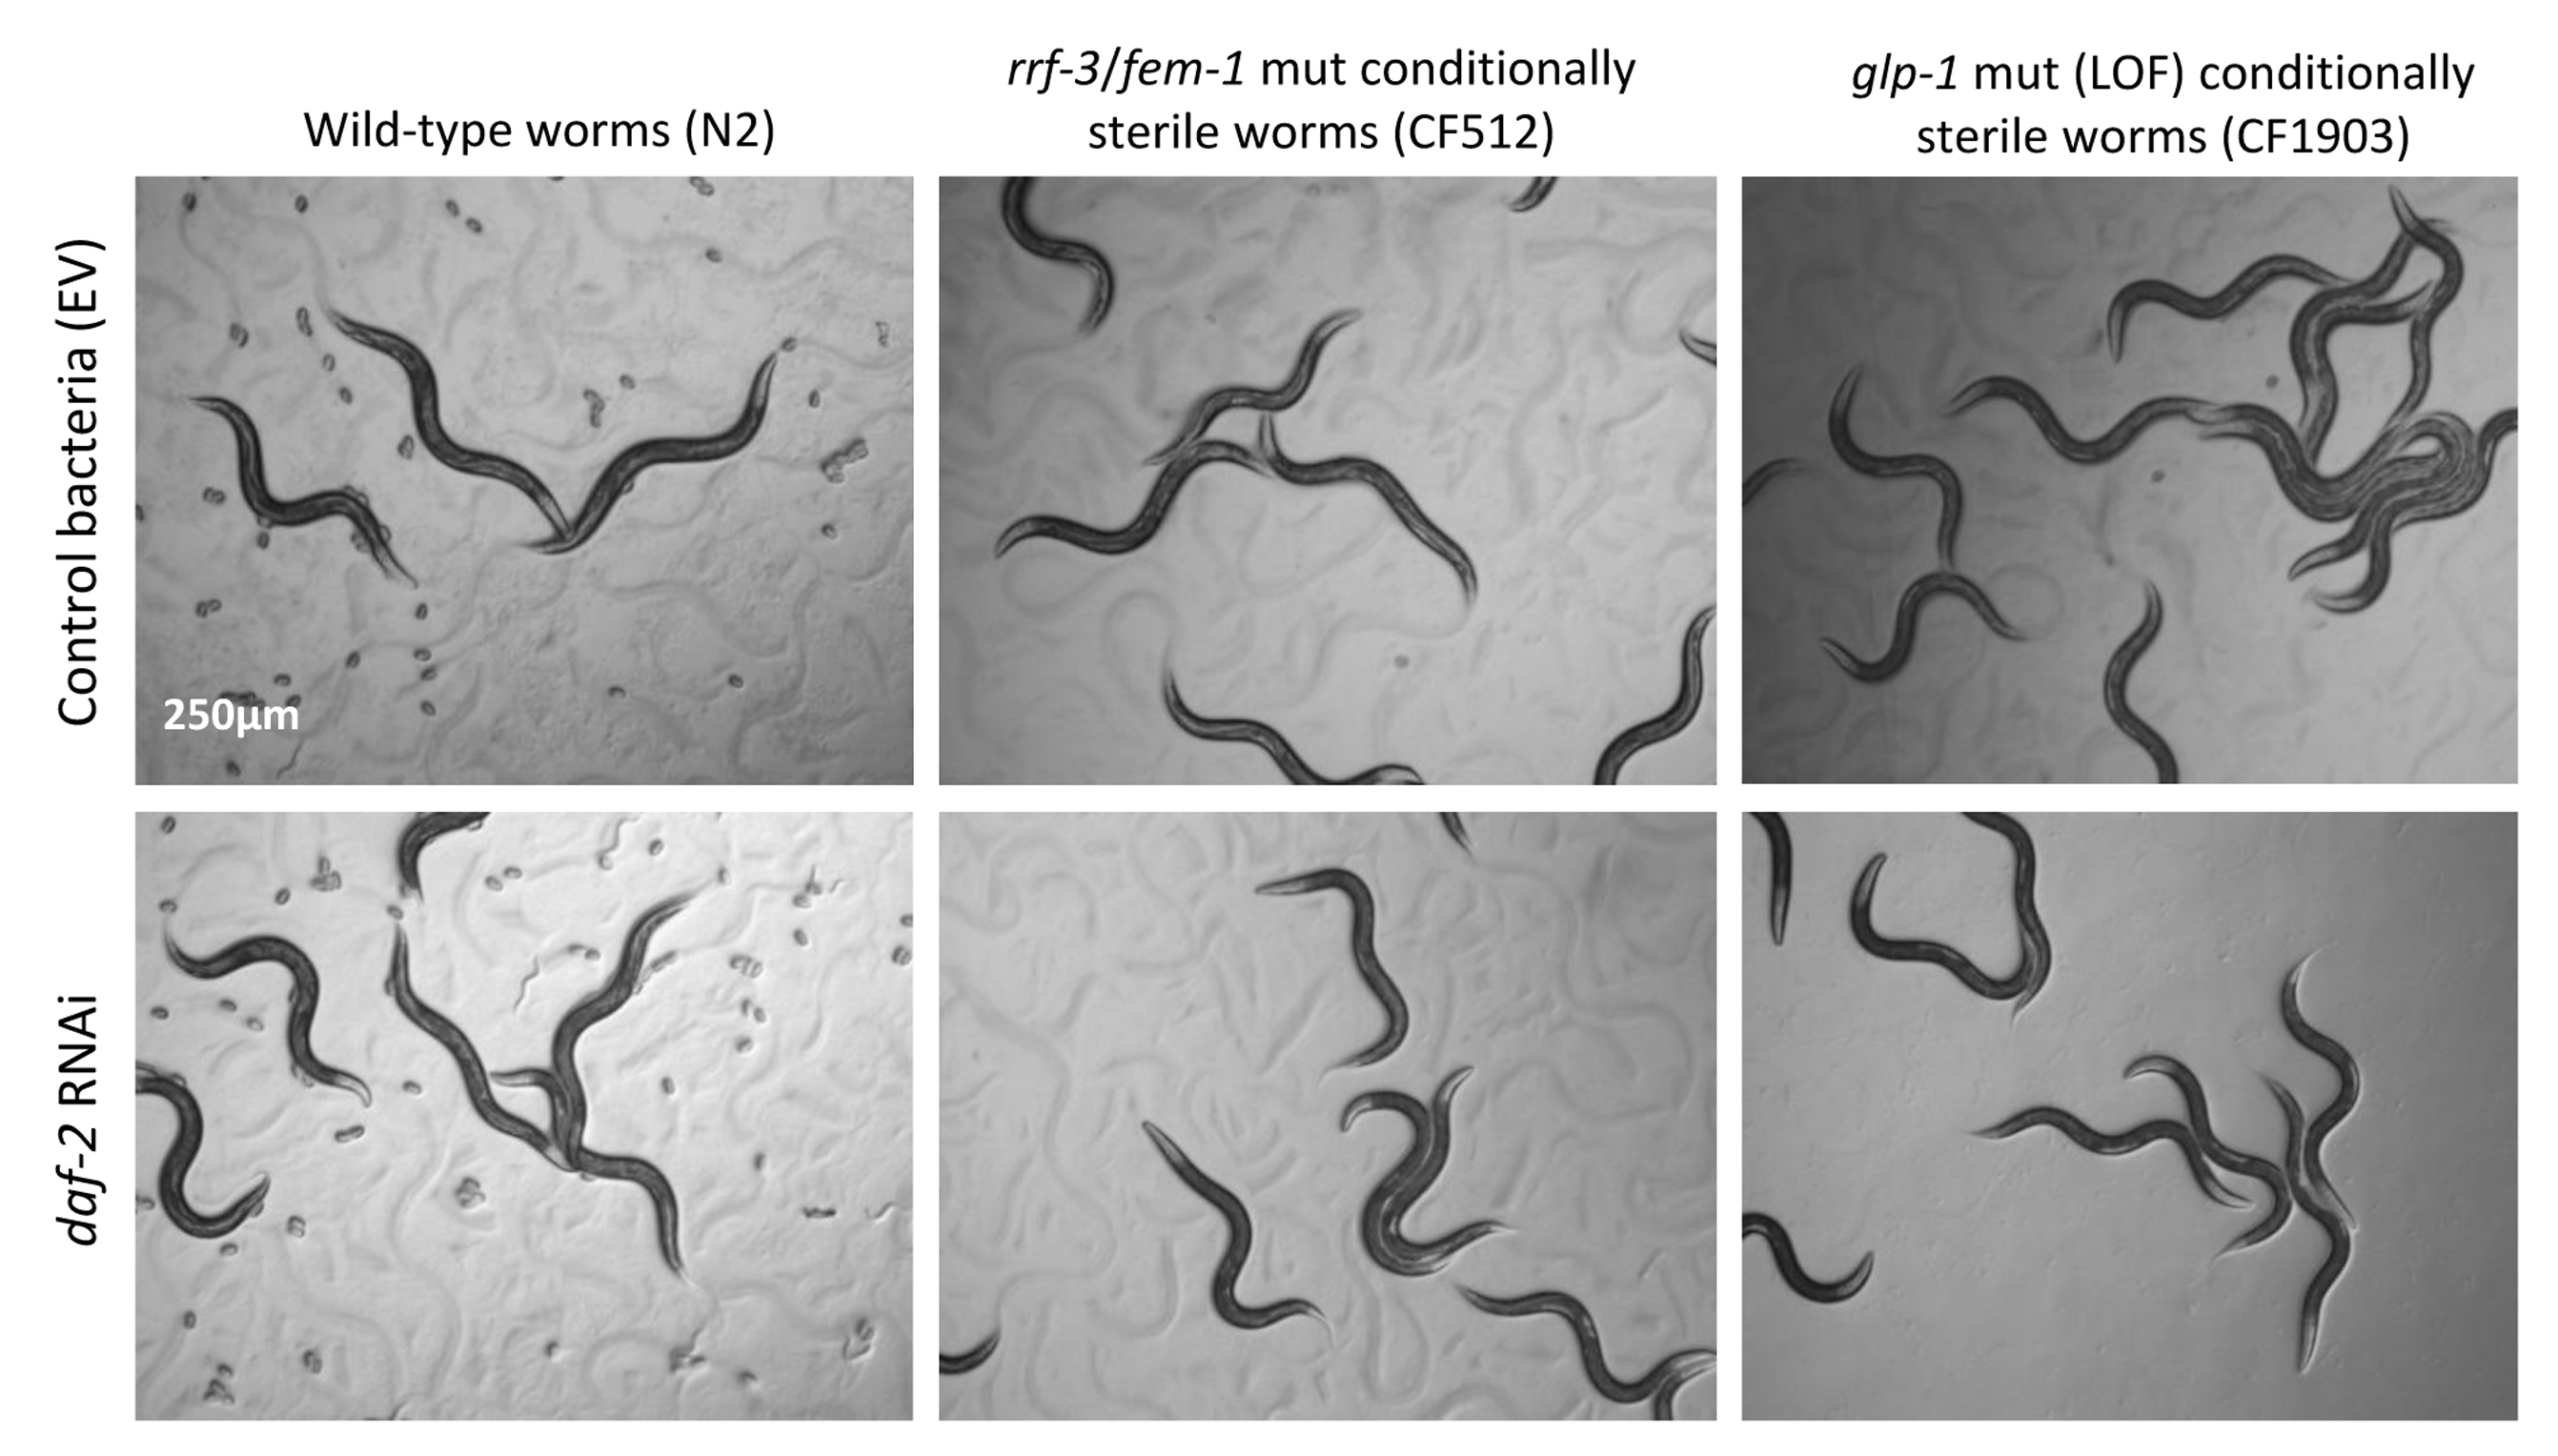

Supplement: supp [file elife-38635-supp-v1.zip › elife_poa_e38635_Figure_1_figure_supplement_1.jpg]

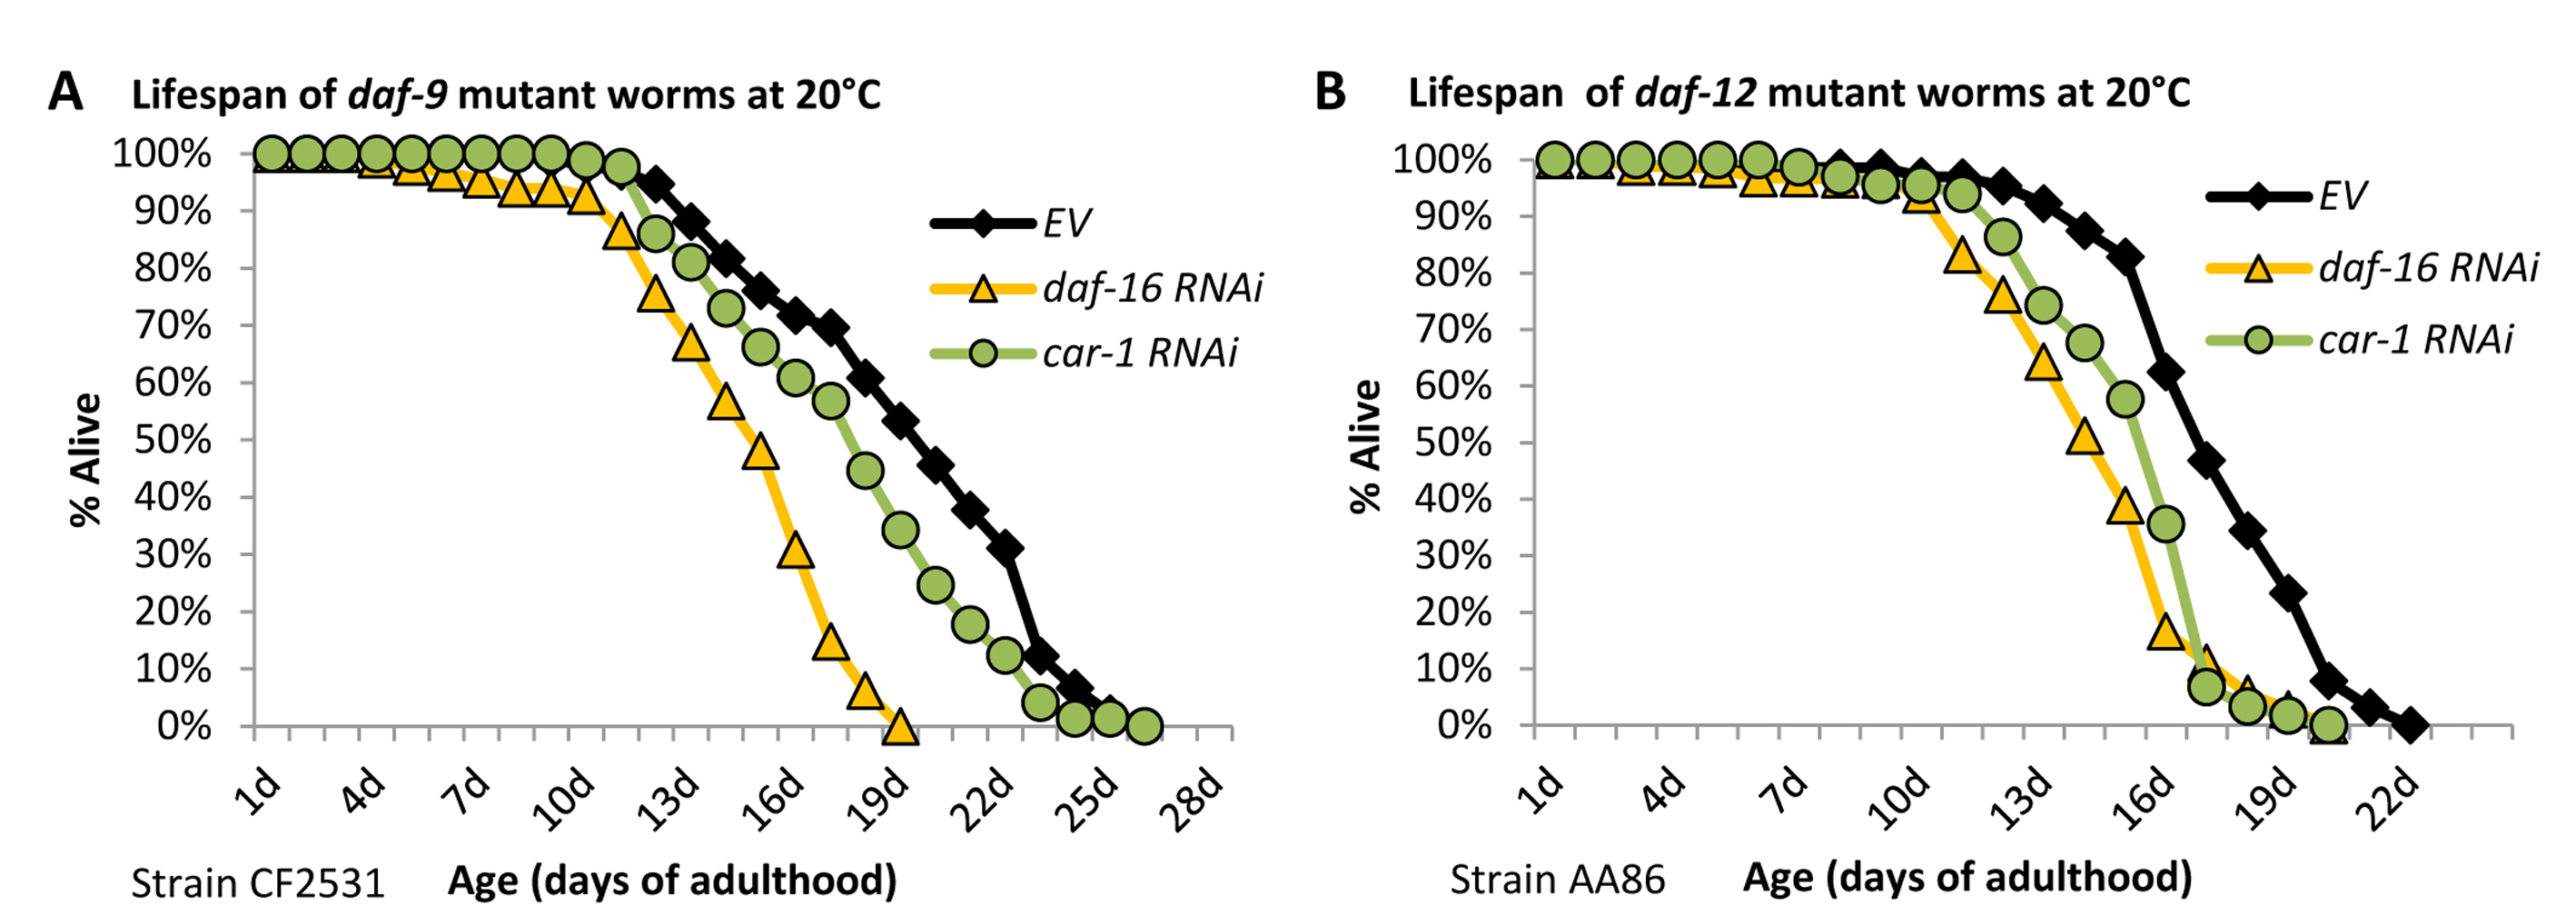

Supplement: supp [file elife-38635-supp-v1.zip › elife_poa_e38635_Figure_3_figure_supplement_1.jpg]

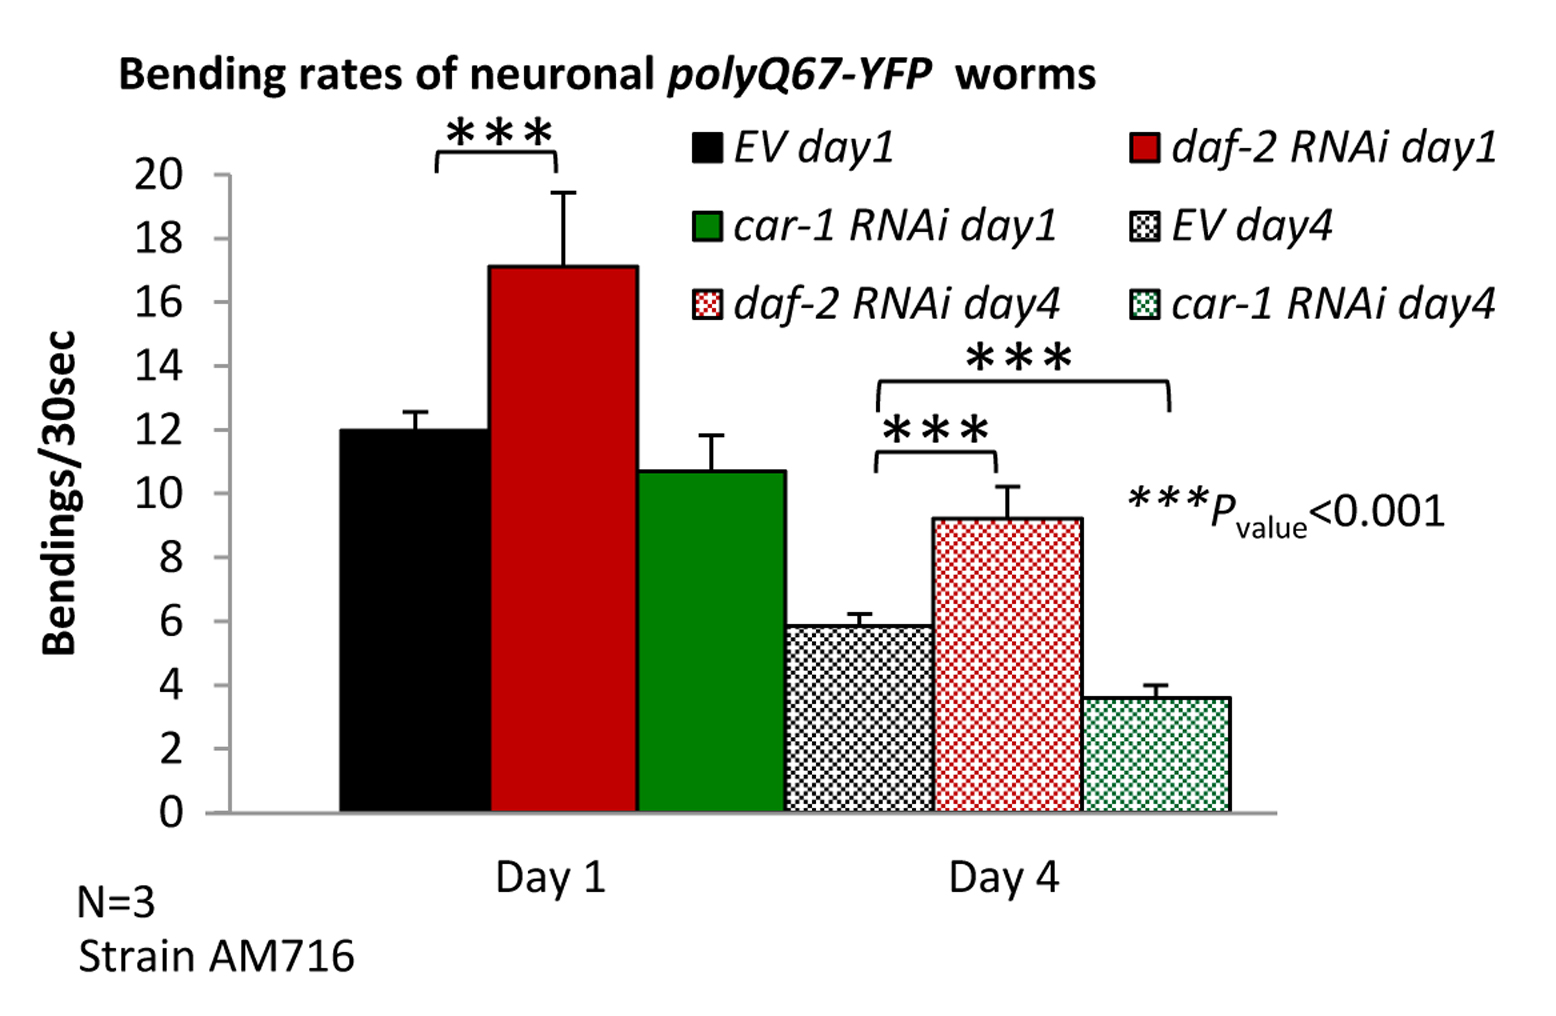

Supplement: supp [file elife-38635-supp-v1.zip › elife_poa_e38635_Figure_5_figure_supplement_1.jpg]

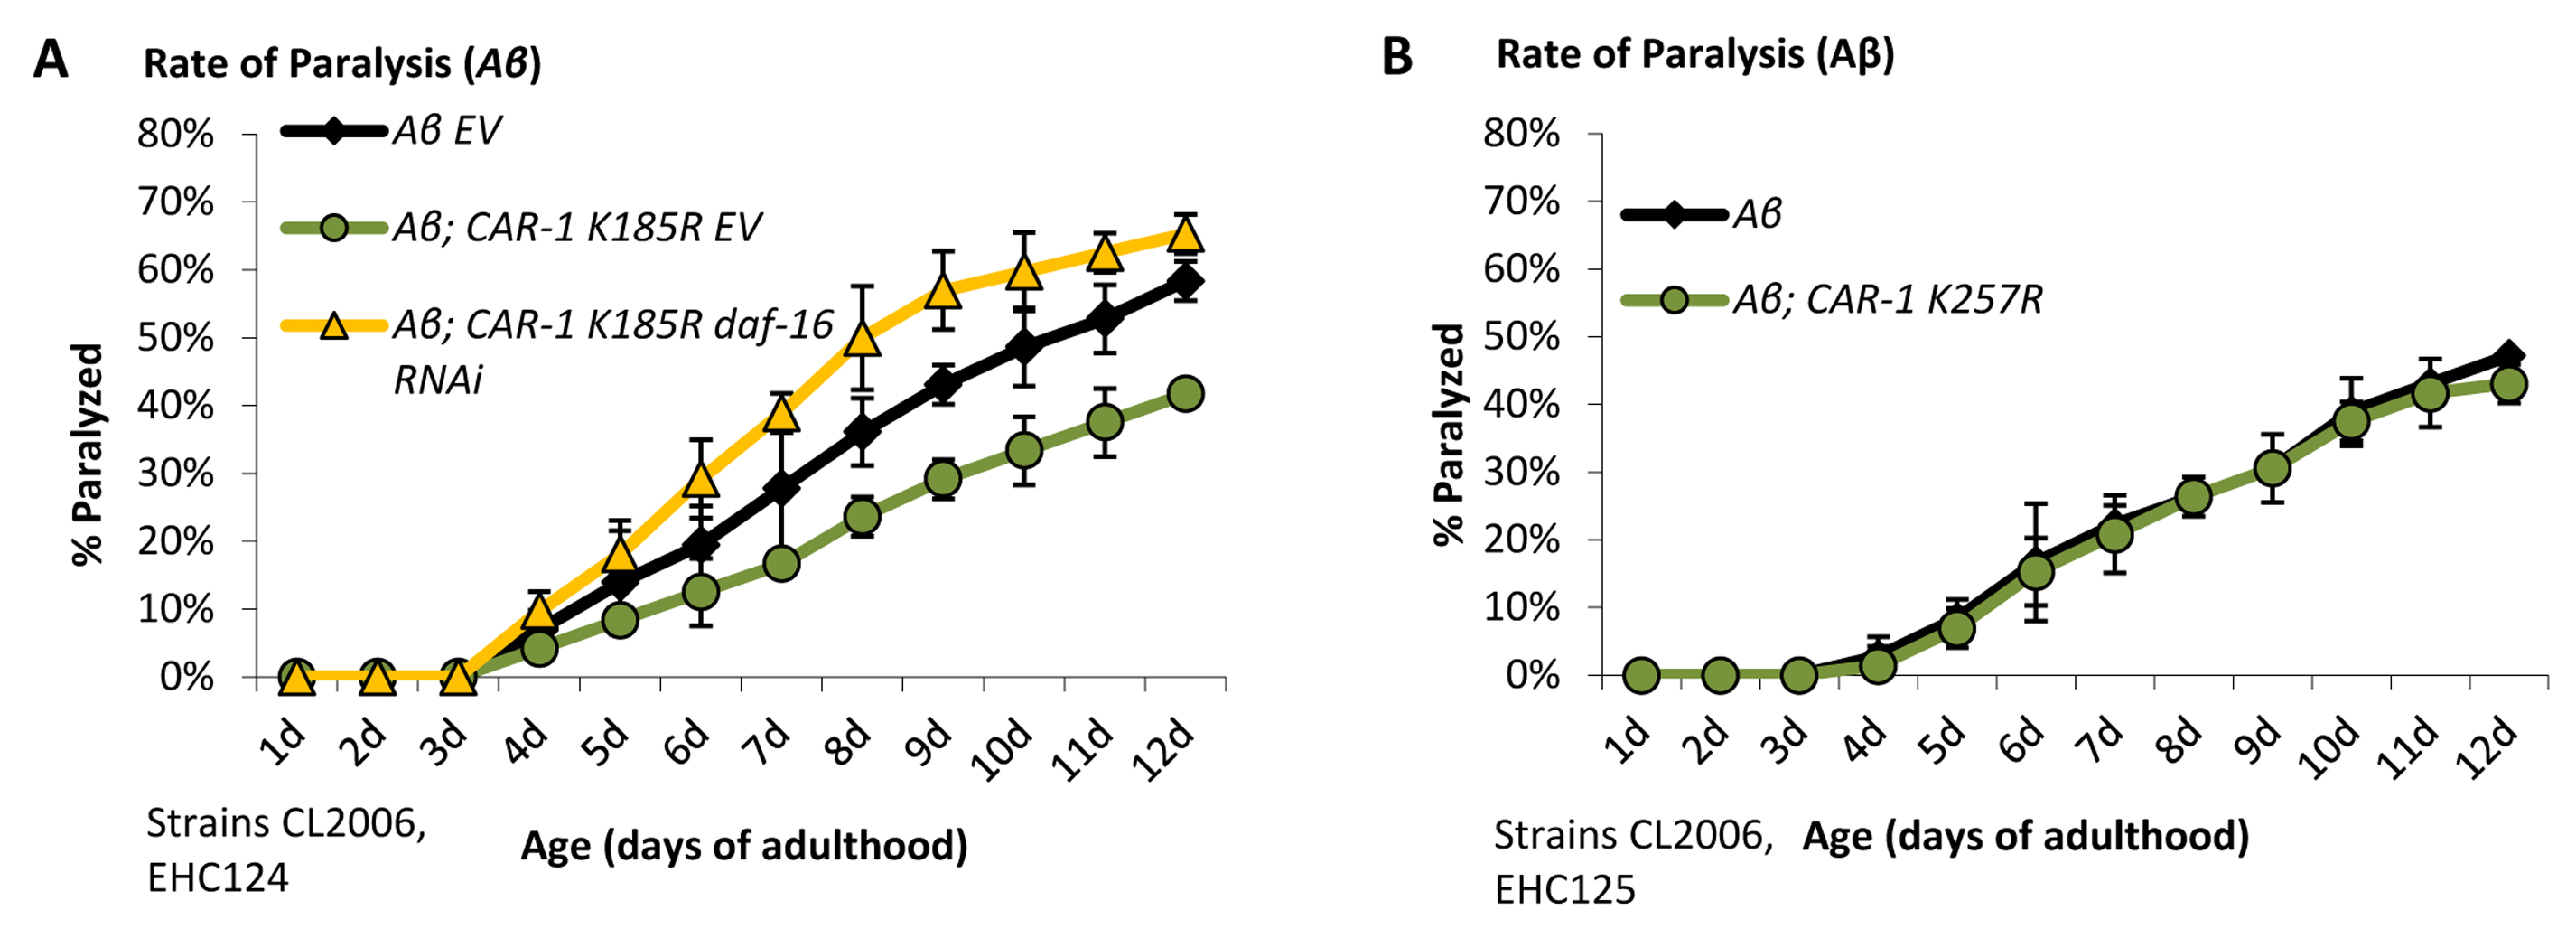

Supplement: supp [file elife-38635-supp-v1.zip › elife_poa_e38635_Figure_4_figure_supplement_1.jpg]

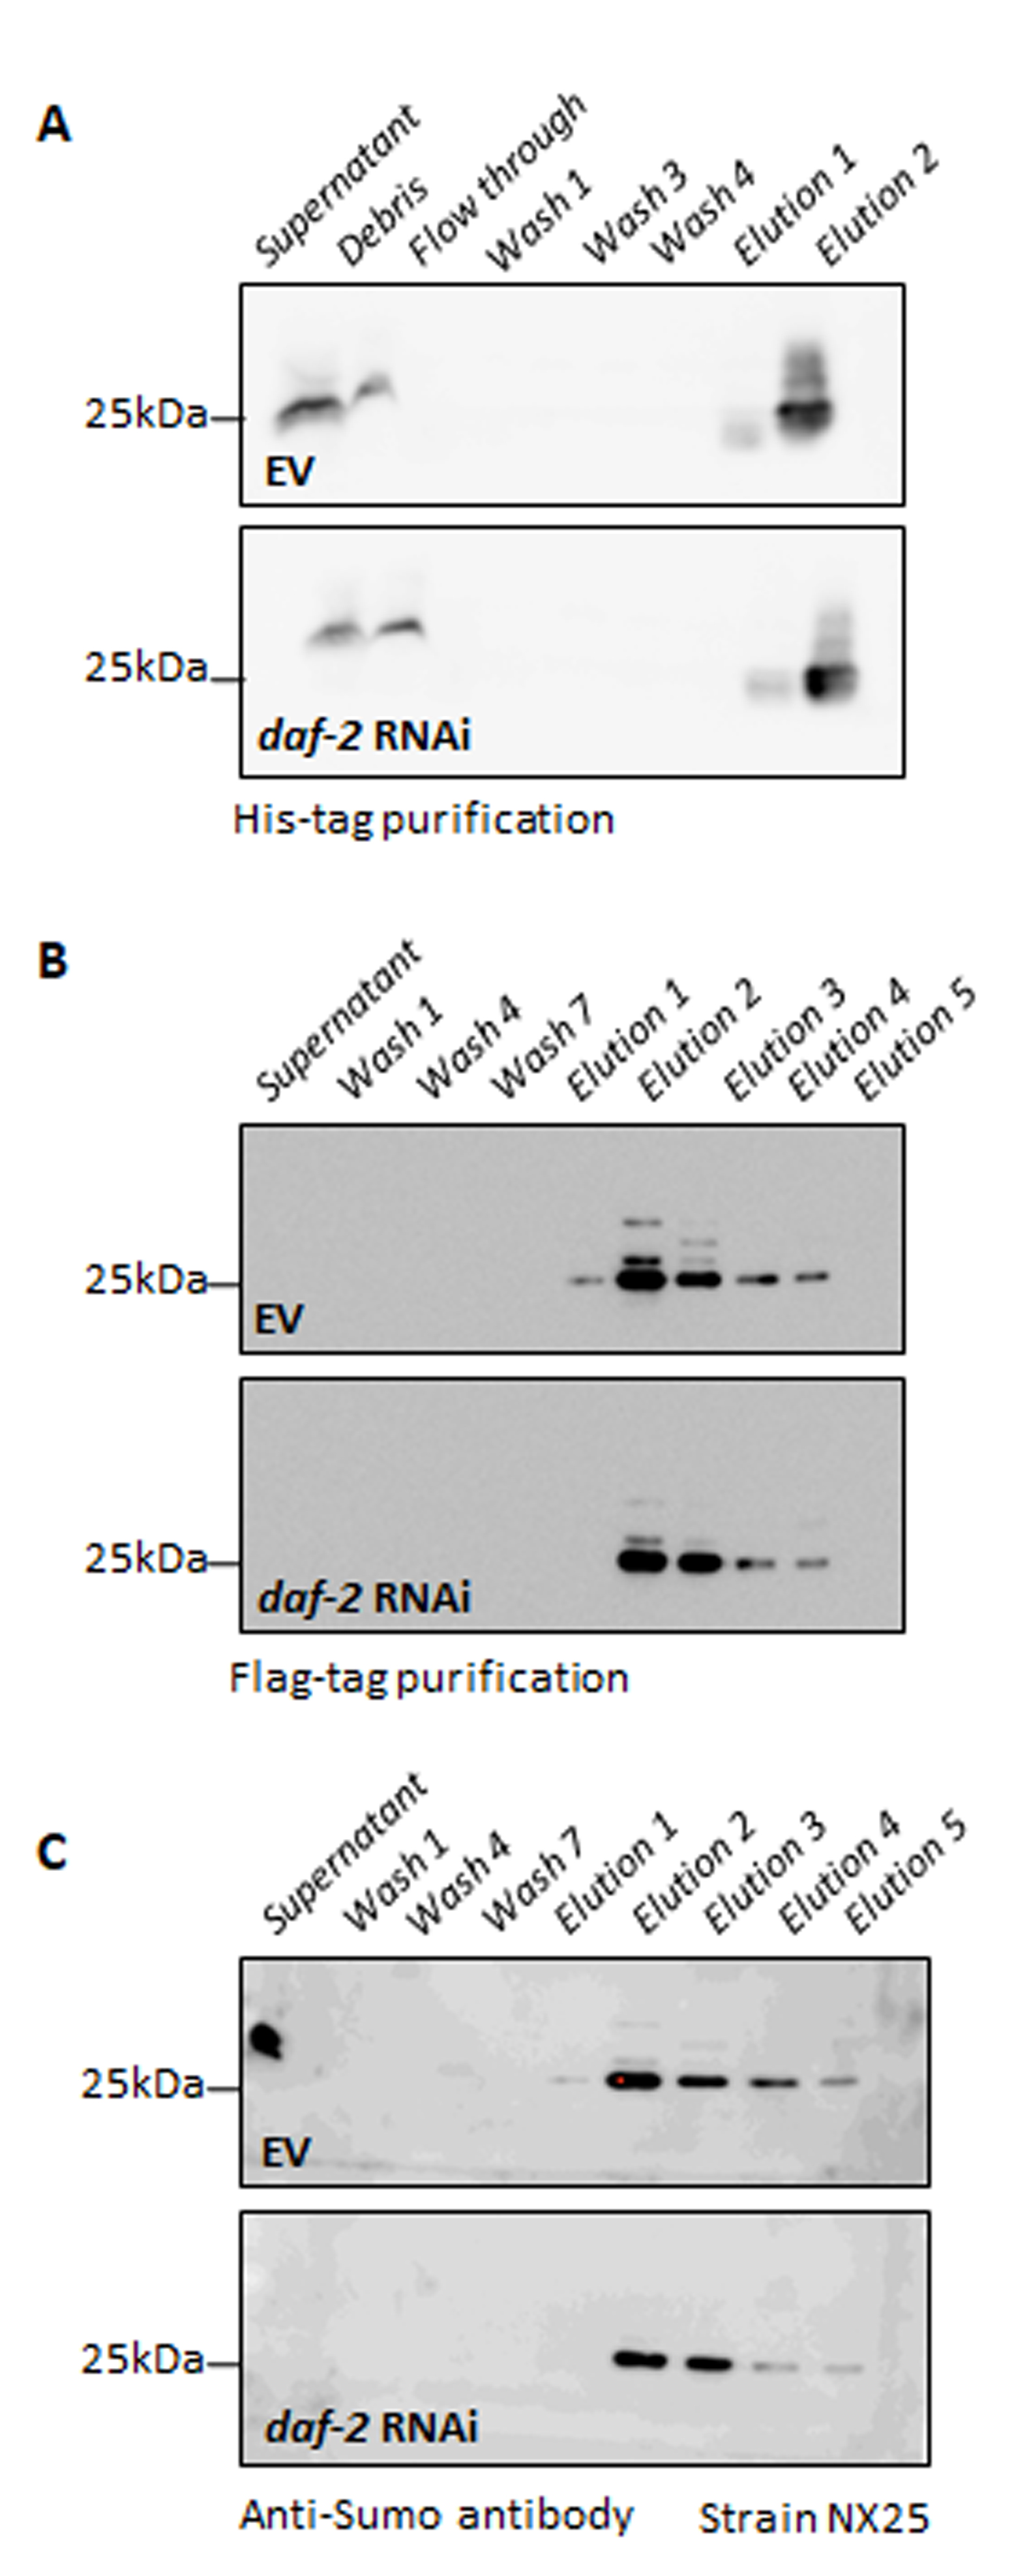

Supplement: supp [file elife-38635-supp-v1.zip › elife_poa_e38635_Figure_1_figure_supplement_2.jpg]

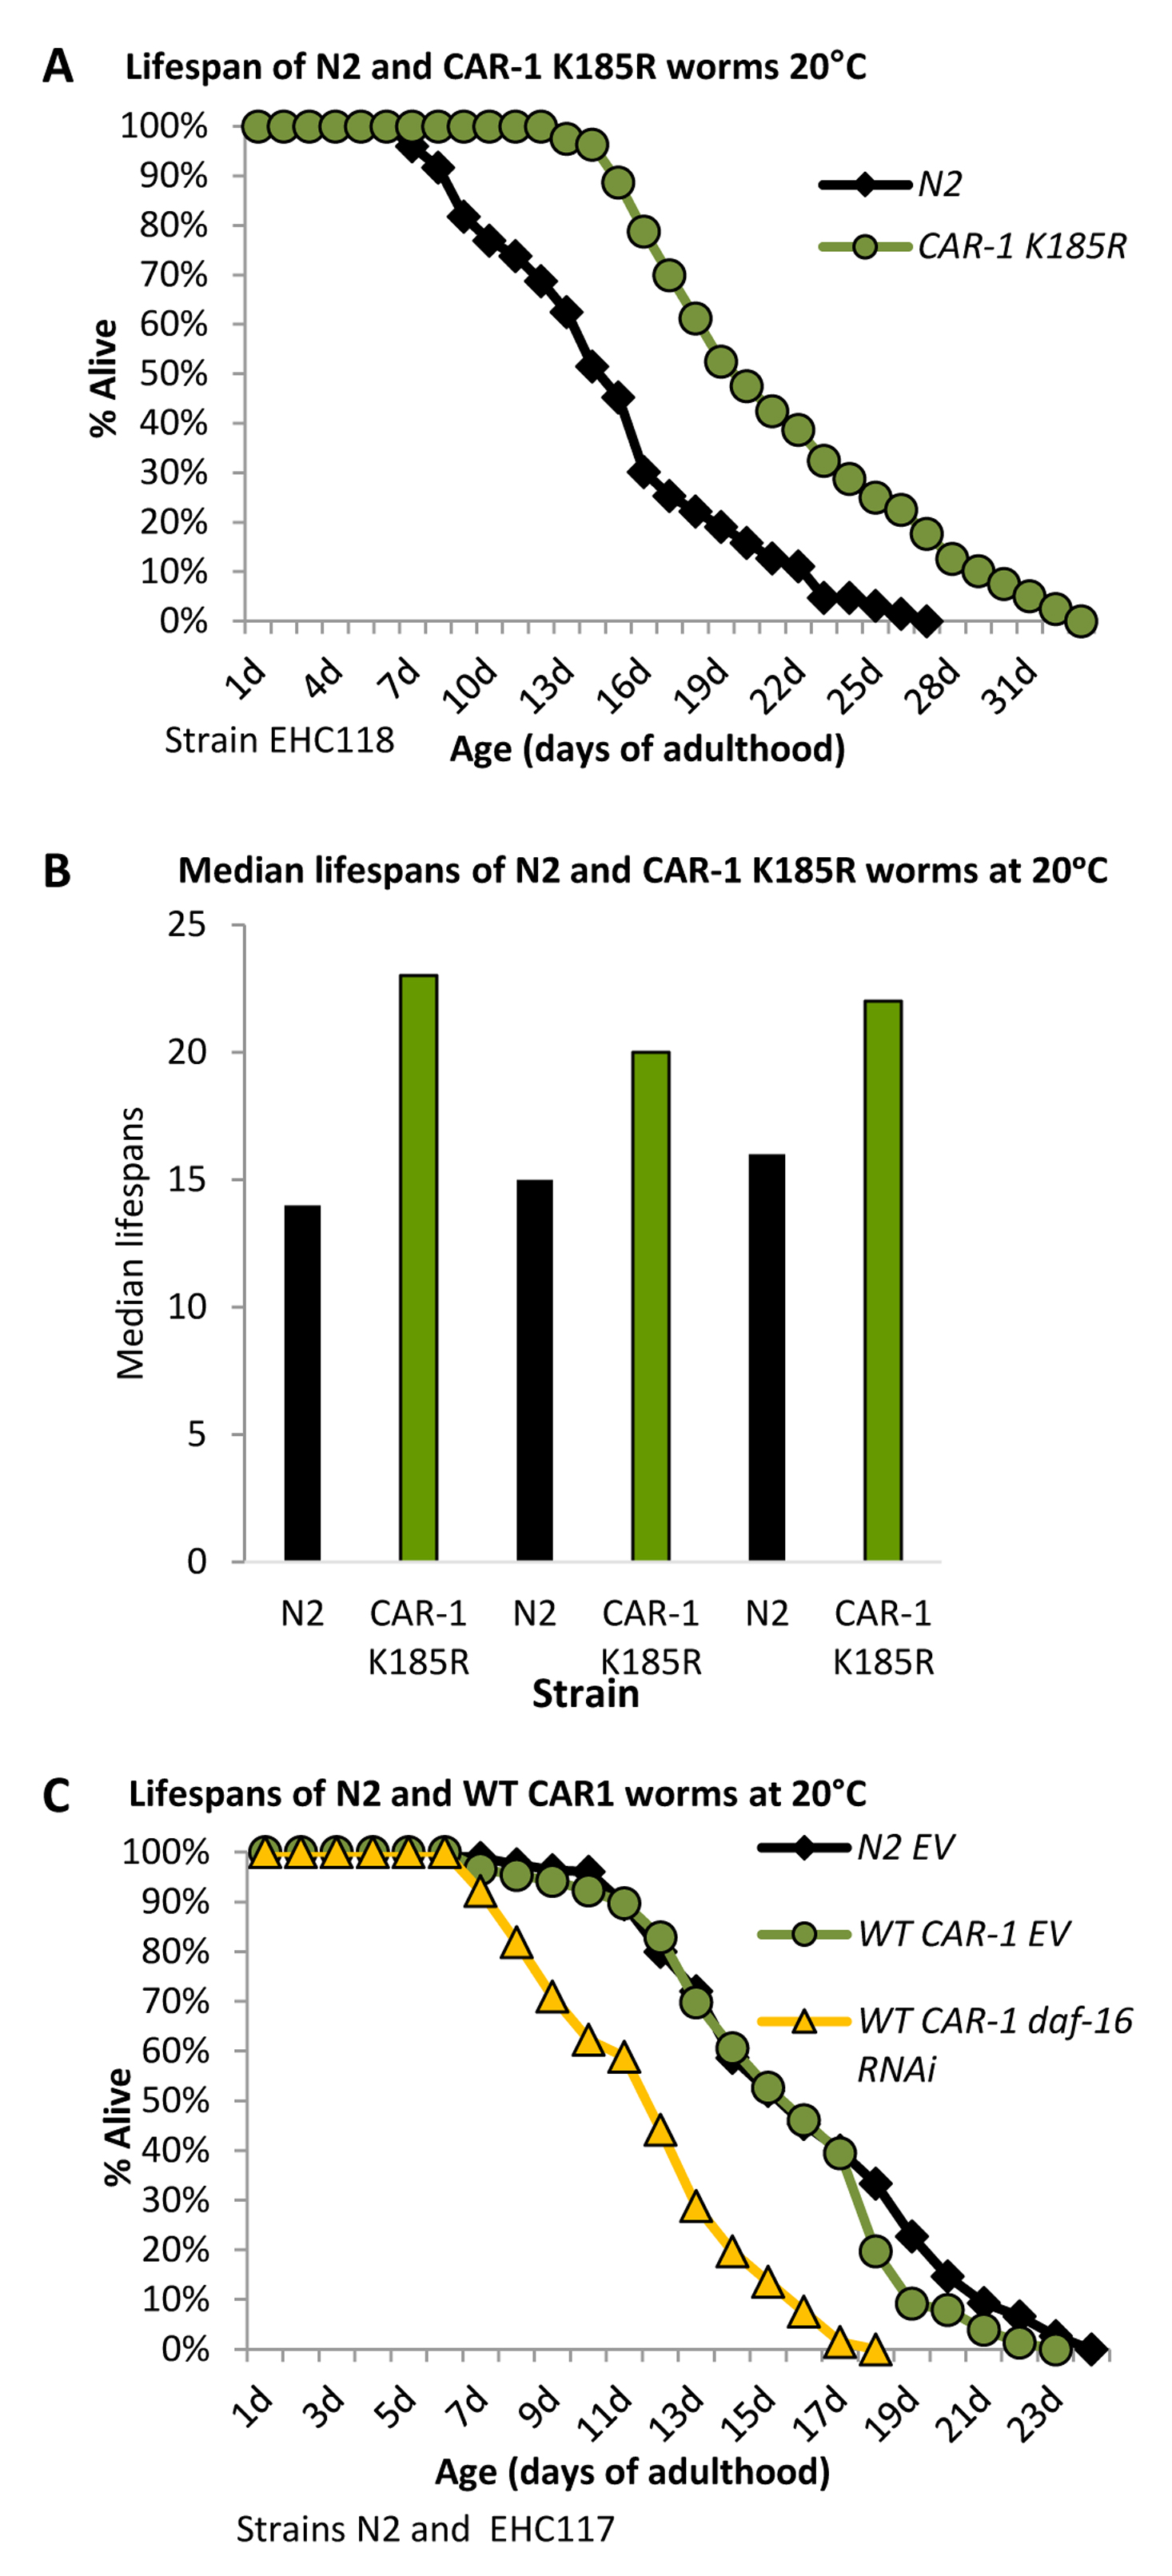

Supplement: supp [file elife-38635-supp-v1.zip › elife_poa_e38635_Figure_2_figure_supplement_4.jpg]

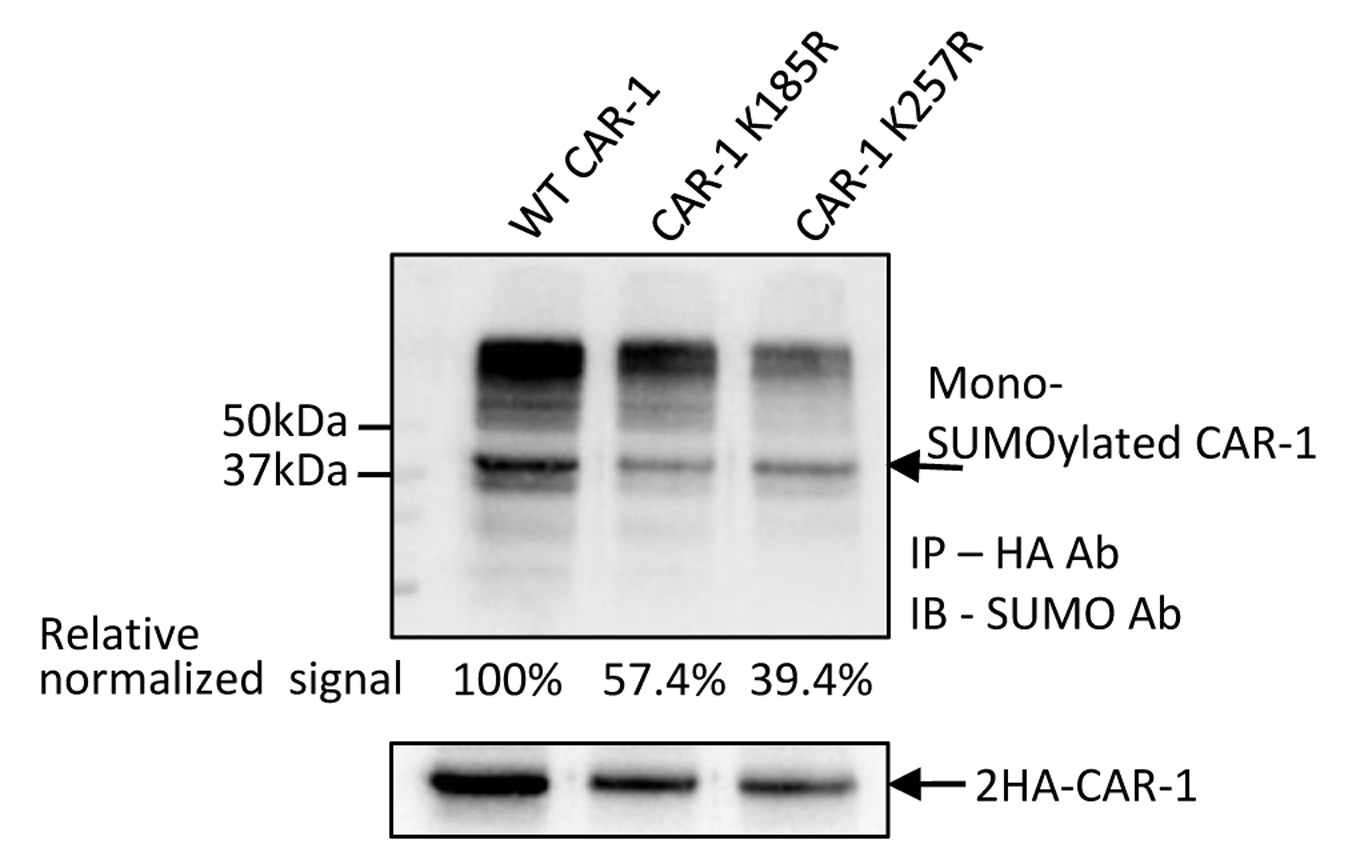

Supplement: supp [file elife-38635-supp-v1.zip › elife_poa_e38635_Figure_2_figure_supplement_3.jpg]
